# Supplementary material for: Identification and expression analysis of the DREB transcription factor family in pineapple ( Ananas comosus (L.) Merr.)
Source: PeerJ journal article supplement (doi:10.7717/peerj.9006), 2020-04-28

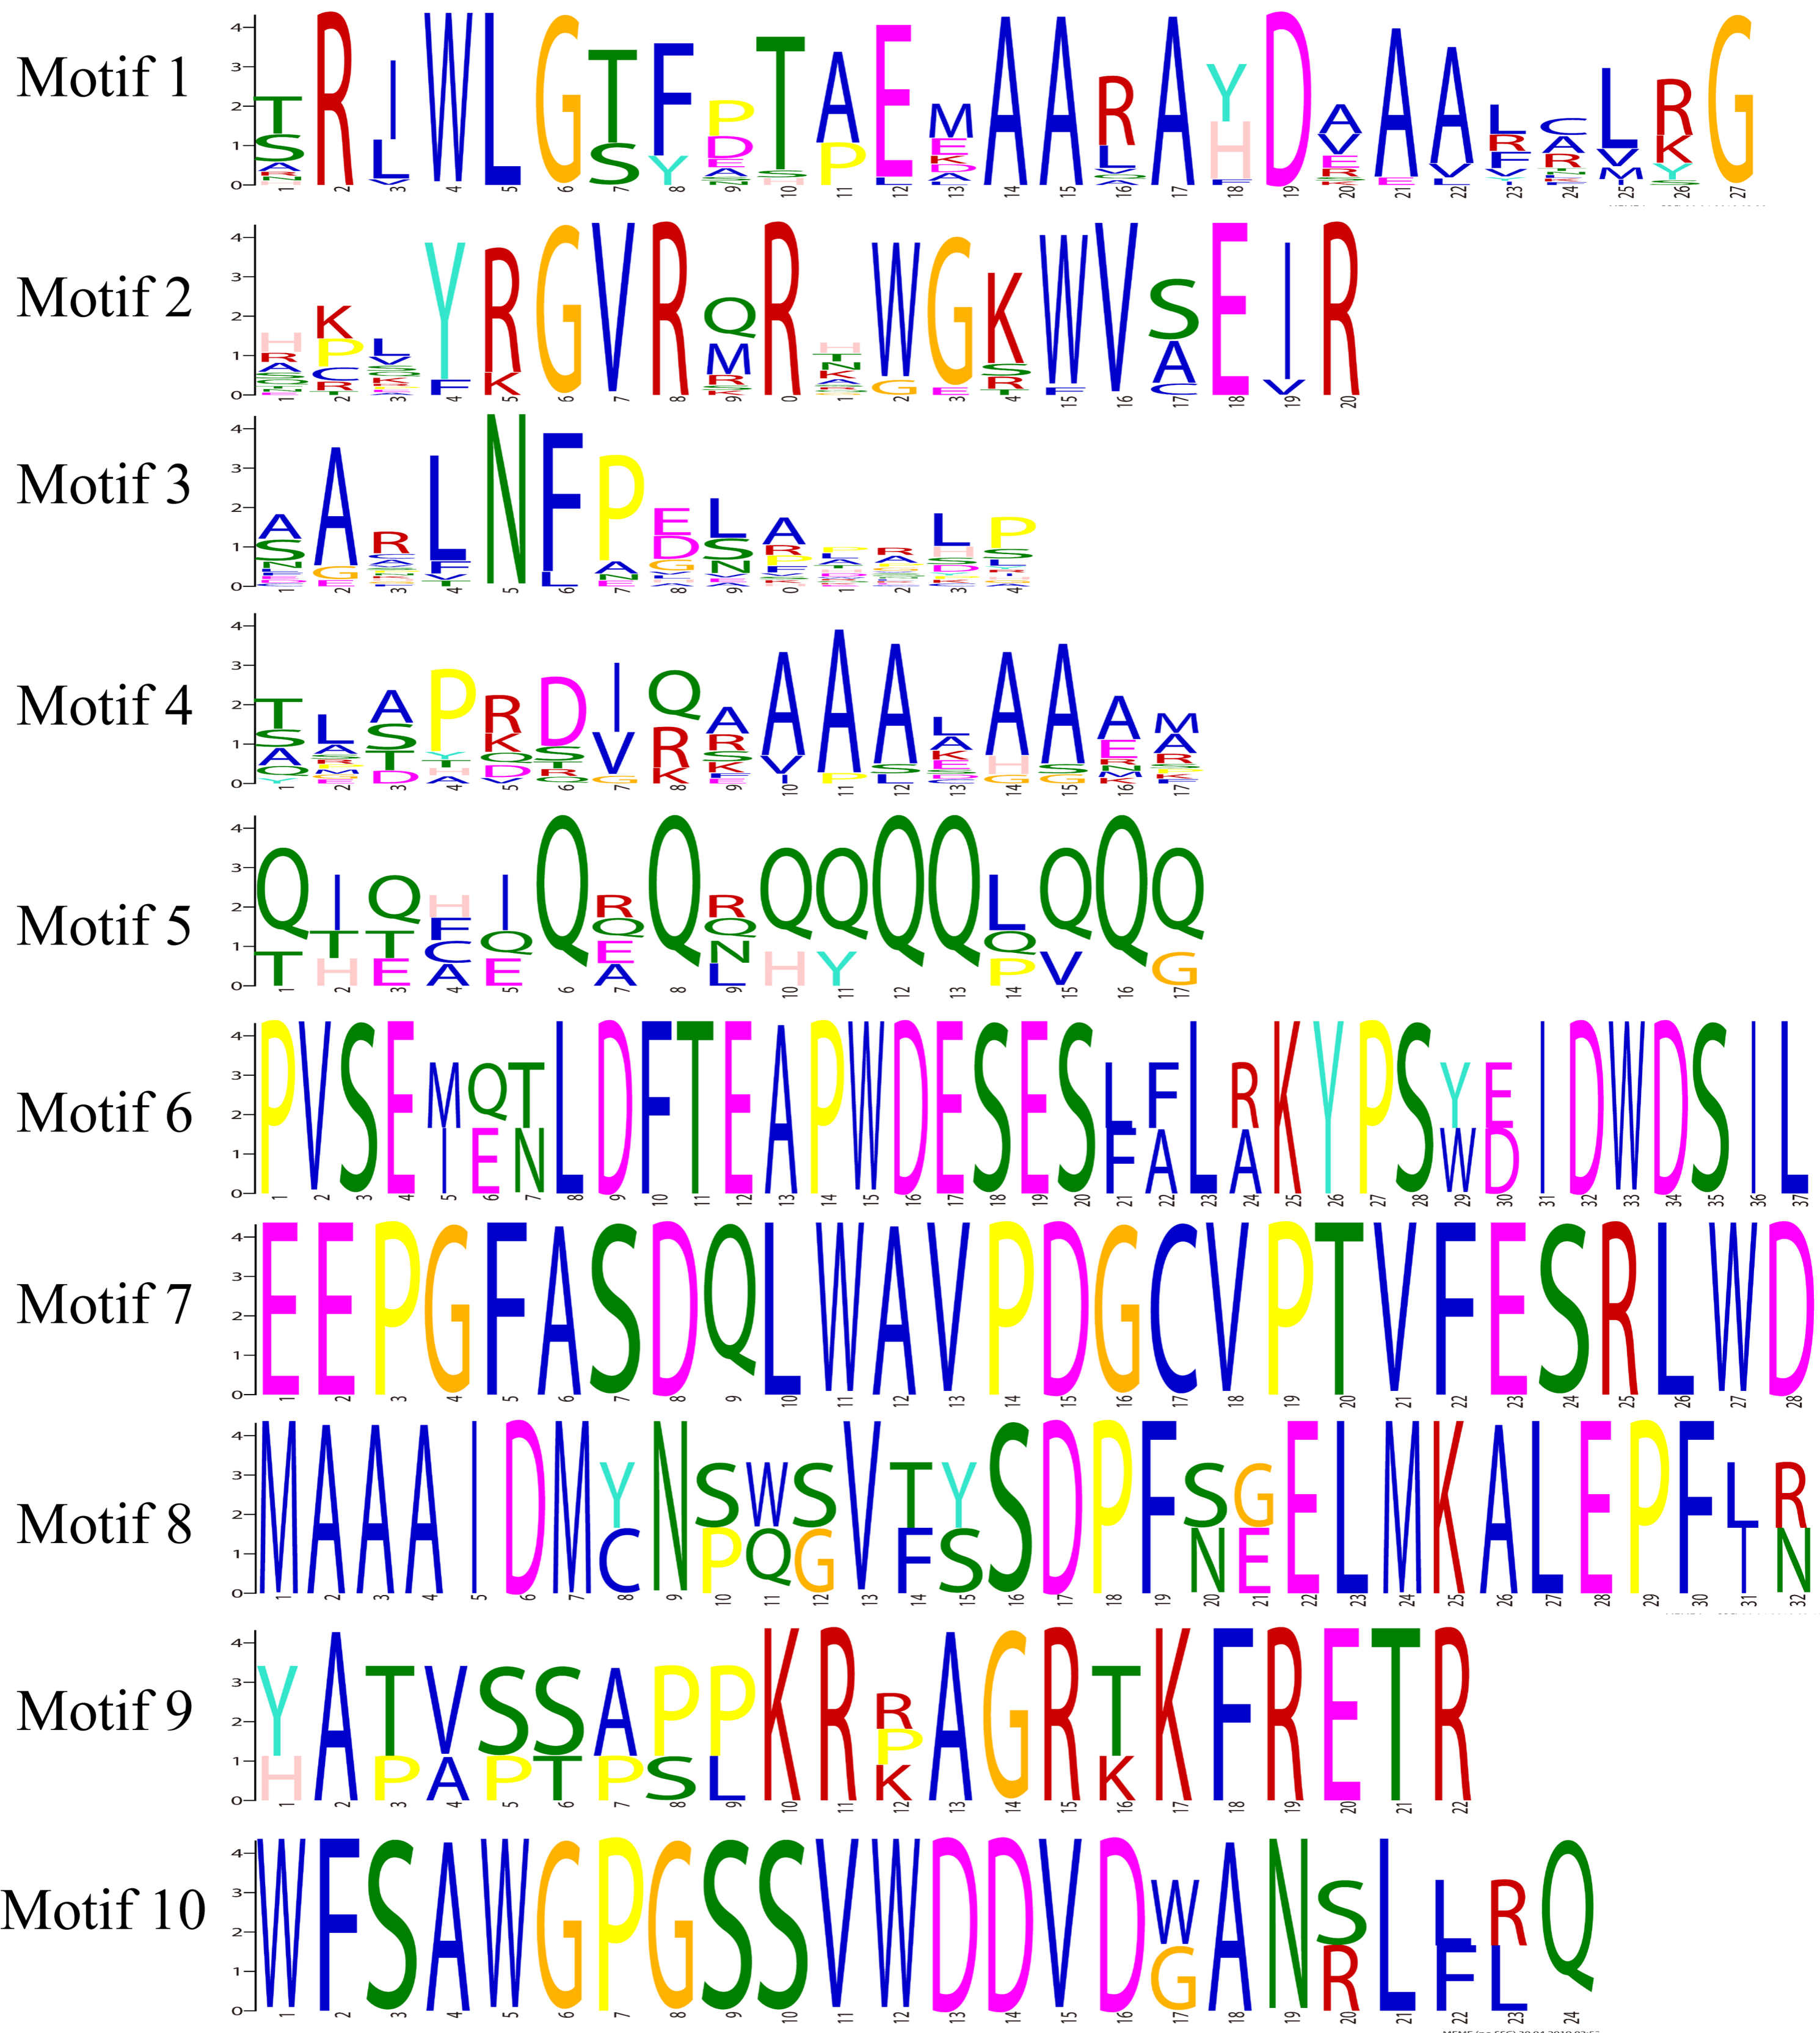

Supplement: Figure_S1.pdf [file Figure_S1.pdf]
