# Supplementary material for: Identification and expression analysis of the DREB transcription factor family in pineapple (Ananas comosus (L.) Merr.)
Source: PeerJ. 2020 Apr 28;8:e9006. doi: 10.7717/peerj.9006 (PMC7194095; doi:10.7717/peerj.9006)
Supplement: Supplemental Information 2 [file peerj-08-9006-s002.xlsx]

## Sheet: Sheet1
Table S1 The specific primers of stress-related AcoDREBs
Gene name	F	R
Q-AcoDREB01	CTCTGCCTGCGGTGACT	GGCCGCGTACGACGAATA
Q-AcoDREB02	GCTGTTGAAGTGGGAGACAT	TCCTCATCGGCTTCTCCTAT
Q-AcoDREB03	CGGACGGAATGTCGGAATTT	GTCCAAATCGTCGTAGCTCATC
Q-AcoDREB05	GTTCCCTTGCCCGAGTTAAT	CAGGACTTGAAACCTCCGTATT
Q-AcoDREB06	CCCAATCACCAACCCAACA	TGGAGTCGCTTGTAGTAGTAGTT
Q-AcoDREB09	CGTCGTTGTCATCCTCTAACTC	CTGTTCTTACCGCCCTTCTTTA
Q-AcoDREB10	CTATCGGAGCCCGAAACAA	AATTGGGTGGCTGGATTCT
Q-AcoDREB11	CGACGGCAATGCAGTAATC	ACTTGGGCGACTGGAAA
Q-AcoDREB12	AGCCGTGCTGCAGTTTA	CAGCTCAGCCCACATCTT
Q-AcoDREB14	GATGGCGATTGCGAGAGG	ACCCGGATCTCCGACAC
Q-AcoDREB15	AGACTGGTCGTACATGGATTTG	CCAAAGAATCGACCCGGAAT
Q-AcoDREB16	ACCACCTCCTCCTCCTTT	TACTCGACTGGCTCTGATGA
Q-AcoDREB17	AGTGAGGAGCTCATGAAAGC	GGAGAAGGTGAAGGTGAGTAAG
Q-AcoDREB18	CCGATCACGTTCGATTCTCTT	CGAATGAAAGGGCGGAGAA
Q-AcoDREB19	TCCAACGTCACGCAAGG	GGGCAGTTCCTGTTGAGAA
Q-AcoDREB20	AACGACAACGGCGACTAC	CTCCAGTATCTAAGCAGCATCAG
