# Supplementary material for: Identification and expression analysis of the DREB transcription factor family in pineapple (Ananas comosus (L.) Merr.)
Source: PeerJ. 2020 Apr 28;8:e9006. doi: 10.7717/peerj.9006 (PMC7194095; doi:10.7717/peerj.9006)
Supplement: Supplemental Information 3 [file peerj-08-9006-s003.xlsx]

## Sheet: Sheet1
Table S2: qRT-PCR data for different treatment.
		Salt treatment (NaCl )
Tissue	Gene name	Time after treatment (h)
		1	standard ERRPR	P-value	6	standard ERRPR	P-value	12	standard ERRPR	P-value	24	standard ERRPR	P-value	48	standard ERRPR	P-value
shoot	AcoDREB01	1.0122	0.1081	1	1.4315	0.0344	0.0208771	2.3319	0.243	0.00769447	10.4619	1.614	0.00428164	6.5386	0.718	0.0015989
	AcoDREB03	1.0055	0.0757	1	2.6505	0.1178	0.00767307	3.9283	0.2042	0.00119491	11.4089	2.7153	0.00315935	4.3152	0.4111	0.00491915
	AcoDREB06	1.0069	0.0838	1	0.176	0.00139	0.000294417	0.401	0.0071	0.000326487	0.3175	0.0877	0.00473125	0.4663	0.0598	0.00628526
	AcoDREB09	1.0034	0.0577	1	1.3517	0.1235	0.0629215	2.3161	0.1349	0.000863531	4.107	0.5675	0.00553927	3.4606	0.6556	0.0202297
	AcoDREB11	1.0055	0.0757	1	2.6505	0.1178	0.000300778	3.9283	0.2042	0.000178216	11.4089	2.7153	0.000134061	4.3152	0.4111	0.00137741
	AcoDREB14	1.0059	0.0779	1	7.9877	0.9217	0.00165039	11.506	0.8256	0.000224005	8.3185	0.8054	0.000830427	2.6842	1.2047	0.0215976
	AcoDREB18	1.02956	0.182319	1	0.471762	0.0788088	0.0483985	0.224969	0.0264624	0.0116261	0.448271	0.0947694	0.0473945	0.589197	0.0491192	0.0800584
	AcoDREB19	1.3397	0.1317	1	3.0811	0.2741	0.00460571	20.2868	5.4903	0.00168213	4.5214	1.4289	0.00415818	1.3967	0.0224	0.691372
root	AcoDREB01	1.2457	0.0627	1	33.9123	0.5685	5.62561e-07	82.7091	11.3637	0.00200477	47.4417	6.3769	0.00192759	18.7243	3.2293	0.00564892
	AcoDREB03	20.6804	0.2375	1	49.3859	7.062	0.000109888	159.773	24.8086	1.7566e-05	71.9477	7.8722	0.000100051	25.4383	10.0161	0.141815
	AcoDREB06	0.6909	0.2346	1	9.9041	0.7287	0.000273356	16.4002	1.1888	0.00178742	12.109	1.4754	0.00104512	12.6317	0.5052	2.80052e-05
	AcoDREB09	0.8491	0.0445	1	55.5602	4.4063	0.000241927	156.592	23.7742	2.13104e-06	142.243	8.7786	8.69105e-05	35.3854	8.9992	0.000436203
	AcoDREB11	2.8789	0.4017	1	49.3859	7.062	0.00276958	159.773	24.8086	2.80071e-06	71.9477	7.8722	0.000935099	25.4383	10.0161	1.14347e-06
	AcoDREB14	7.791	1.2002	1	69.0663	6.6953	0.000840811	218.324	3.2843	4.5576e-07	118.338	11.216	0.000607628	68.7438	7.7394	0.0014699
	AcoDREB18	12.8808	0.896433	1	31.4497	3.46027	0.00653932	72.0603	2.01805	1.15237e-05	44.5901	4.66916	0.00262638	35.1572	8.91462	0.000765343
	AcoDREB19	1	0.02	1	25.6891	4.5773	0.00571568	46.9818	6.0113	0.00156949	35.4851	4.7352	0.00188914	25.7333	0.5127	1.10454e-06
		Drought treatment (mannitol)
Tissue	Gene name	Time after treatment (h)
		1	standard ERRPR	P-value	6	standard ERRPR	P-value	12	standard ERRPR	P-value	24	standard ERRPR	P-value	48	standard ERRPR	P-value
shoot	AcoDREB01	1.0122	0.1081	1	4.1291	0.8869	0.0251514	7.8035	0.8225	0.00121265	4.988	0.5686	0.002352	5.1645	0.6969	0.00416063
	AcoDREB03	1.0384	0.2061	1	16.3211	1.8334	0.000877348	26.1971	0.8045	7.07364e-06	14.1919	1.9046	0.000159095	10.0847	0.8584	0.000511223
	AcoDREB06	1.0069	0.0838	1	0.6591	0.1381	0.097686	0.6288	0.2855	0.203371	0.6922	0.2016	0.222972	0.7353	0.2325	0.333526
	AcoDREB09	1.0034	0.0577	1	30.0165	4.4617	0.00288654	13.412	2.0645	0.00386318	7.9214	2.3926	7.58641e-05	2.6965	0.1504	0.000462842
	AcoDREB11	1.0055	0.0757	1	10.3844	2.772	0.00614383	20.6484	0.6106	5.73903e-06	4.7682	0.5113	0.00189249	5.9009	0.6695	0.00190631
	AcoDREB14	1.0059	0.0779	1	47.8625	14.4772	0.00055599	118.45	3.8109	6.61095e-06	38.6271	7.3124	0.00677001	42.1261	5.7878	0.00207424
	AcoDREB18	1.02956	0.182319	1	6.14182	0.818552	0.00366261	12.8563	0.716898	8.94771e-05	9.28582	2.65487	0.000364458	8.39217	0.763455	0.000719649
	AcoDREB19	1.3397	0.1317	1	18.2556	3.8754	3.74257e-05	28.998	1.3042	2.98225e-05	18.0738	1.9912	0.00110634	13.6942	2.186	0.00086844
root	AcoDREB01	1.2457	0.0627	1	0.4377	0.0245	0.000276634	0.6286	0.1267	0.0120188	2.6683	0.3486	8.13436e-05	2.4276	0.2299	0.00771014
	AcoDREB03	20.6804	0.2375	1	2.1739	0.1342	8.98591e-05	3.5115	0.3503	2.20632e-06	6.6068	0.9014	0.000112165	5.8956	0.823	6.6113e-05
	AcoDREB06	0.6909	0.2346	1	2.0078	0.3733	0.0681515	3.9715	0.5022	0.010058	4.1444	0.5235	0.030709	3.6146	0.4112	0.0416917
	AcoDREB09	0.849	0.0445	1	1.5385	0.1385	0.00903986	2.9649	0.0892	2.90925e-05	12.4974	0.8812	0.00019021	4.9061	1.2079	8.3039e-06
	AcoDREB11	2.8789	0.4017	1	0.7185	0.2136	0.00898322	1.2182	0.1865	0.0199593	1.6395	0.0784	0.0388581	1.6403	0.0862	0.0393747
	AcoDREB14	7.791	1.2002	1	1.3073	0.2946	0.00923928	4.8917	1.8029	0.224725	11.9141	0.3555	0.0498409	11.1598	1.8733	0.253377
	AcoDREB18	12.8808	0.896433	1	0.170772	0.00171689	0.000143672	0.726077	0.0537469	0.000172472	4.45226	0.499978	0.00119869	4.18286	0.117927	0.000652839
	AcoDREB19	1	0.02	1	1.0266	0.1588	0.875341	1.1555	0.3025	0.634278	14.978	1.8061	0.00150137	15.2375	1.1212	0.000221515
		Cold treatment (4℃)
Tissue	Gene name	Time after treatment (h)
		1	standard ERRPR	P-value	6	standard ERRPR	P-value	12	standard ERRPR	P-value	24	standard ERRPR	P-value	48	standard ERRPR	P-value
shoot	AcoDREB01	1.0122	0.1081	1	14.1181	0.624	3.22135e-05	9.9193	0.1283	7.53336e-07	5.291	0.0649	4.49307e-06	4.2517	0.3128	0.000610637
	AcoDREB03	1.0384	0.2061	1	101.159	7.0401	0.000142209	61.0411	4.6017	0.000200456	21.8425	2.0782	0.000570349	24.3223	1.3085	0.00200346
	AcoDREB06	1.0069	0.0838	1	0.5642	0.3948	0.105449	0.6712	0.2538	0.108236	0.6099	0.2392	0.075925	1.2882	0.3395	0.466069
	AcoDREB09	1.0034	0.0577	1	1.3187	0.2198	0.237617	1.6662	0.5054	0.131148	15.1434	2.5501	0.00517904	22.6125	3.2888	0.00277814
	AcoDREB11	1.0055	0.0757	1	8.2092	0.1642	2.37398e-06	27.4803	5.4536	0.00831476	38.0136	1.3434	1.03915e-05	31.2848	2.9733	0.000524394
	AcoDREB14	1.0059	0.0779	1	4.468	1.4962	0.0819703	42.7129	6.622	0.0032487	158.069	16.7844	0.000726343	139.084	12.9719	0.000441119
	AcoDREB18	1.02956	0.182319	1	1.31583	0.186075	0.333519	8.00296	0.700862	0.000650399	15.9002	0.413188	5.0731e-06	11.9629	0.223126	2.88109e-06
	AcoDREB19	1.3397	0.1317	1	3.6351	0.3088	0.00239472	9.776	1.7853	0.00922174	14.7534	2.8252	0.00901876	19.2038	1.0338	0.00127707
root	AcoDREB01	1.2457	0.0627	1	0.4377	0.0245	0.00258268	0.6286	0.1267	0.000241468	2.6683	0.3486	8.12637e-05	2.4276	0.2299	0.000555651
	AcoDREB03	20.6804	0.2375	1	56.8392	9.8488	0.00117539	69.9913	8.2289	0.00390657	108.426	10.6535	0.00118609	178.104	28.1464	1.35256e-05
	AcoDREB06	0.6909	0.2346	1	4.466	1.5853	0.0050178	29.9983	2.4105	0.00101951	23.4404	2.6246	0.000989766	16.2835	2.0785	0.00173025
	AcoDREB09	0.8489	0.0445	1	15.072	0.2715	8.37651e-07	32.5111	5.2496	0.00380964	81.1438	9.5662	0.00110244	76.0316	8.9444	0.00109649
	AcoDREB11	2.8789	0.4017	1	8.3925	0.3491	0.000490087	11.8179	0.938	0.000936041	29.9552	4.7351	0.00468862	74.5743	9.8501	0.00189905
	AcoDREB14	7.791	1.2002	1	19.0488	5.8352	0.131793	26.7056	7.6998	0.00919656	199.142	22.134	0.00099022	386.147	0.8932	1.46669e-09
	AcoDREB18	12.8808	0.896433	1	2.59348	0.346572	0.00043167	6.08153	1.19265	0.00183221	17.2722	2.26842	0.14617	18.5733	2.05519	0.0640615
	AcoDREB19	1	0.02	1	1.646	1.0226	0.274114	2.108	0.366	0.0388782	18.4787	1.7731	0.000594012	24.3884	1.2646	0.00538344
		High temperature treatment (45℃)
Tissue	Gene name	Time after treatment (h)
		1	standard ERRPR	P-value	6	standard ERRPR	P-value	12	standard ERRPR	P-value	24	standard ERRPR	P-value	48	standard ERRPR	P-value
shoot	AcoDREB01	1.0122	0.1081	1	0.1445	0.0232	0.00142273	0.2908	0.046	0.00356077	1.2484	0.0611	0.129822	2.7927	0.3216	0.00630216
	AcoDREB03	1.0384	0.2061	1	4.3835	0.3399	0.00109109	12.2455	4.1084	0.00346883	9.9153	1.4046	0.00333558	5.3277	0.5661	0.00036847
	AcoDREB06	1.0069	0.0838	1	0.0753	0.0272	0.000451995	0.1763	0.1183	0.00459356	0.2008	0.0332	0.000863908	0.2044	0.0626	0.00155107
	AcoDREB09	1.0034	0.0577	1	1.3444	0.0671	0.0182166	18.2559	3.2956	0.00636578	18.0723	1.1219	0.000109381	9.9735	0.7357	0.000262859
	AcoDREB11	1.0055	0.0757	1	0.0791	0.0209	0.00029614	0.1473	0.0621	0.000935769	6.9524	0.1671	5.40024e-06	5.6585	0.4919	0.000729086
	AcoDREB14	1.0059	0.0779	1	1.2502	0.2447	0.395301	1.8209	0.527	0.200787	37.3283	4.0967	0.000894408	39.9886	1.2829	7.03906e-06
	AcoDREB18	1.02956	0.182319	1	0.443545	0.0496865	0.0361808	0.639482	0.0634266	0.113399	3.51758	0.678365	0.0239709	3.56047	0.488022	0.00829072
	AcoDREB19	1.3397	0.1317	1	0.1479	0.0503	0.00107409	0.3439	0.05	0.0021162	2.2877	0.2351	0.0245139	2.8459	0.4236	0.0273873
root	AcoDREB01	1.2457	0.0627	1	1.7137	0.12	0.0259231	4.3604	0.3878	0.0013701	10.0475	0.7777	0.000351803	21.4231	0.5855	4.3282e-06
	AcoDREB03	20.6804	0.2375	1	1.2328	0.255	6.17331e-07	2.4335	0.1937	4.7656e-07	27.292	3.1585	0.105143	24.7612	2.6213	0.119134
	AcoDREB06	0.6909	0.2346	1	2.5407	0.6276	0.0508173	10.3449	1.9028	0.000733582	4.8827	0.7569	0.0074937	1.8188	0.6474	0.176737
	AcoDREB09	0.8487	0.0445	1	4.41	0.7003	0.00710674	7.3405	0.583	0.000374547	18.6753	0.8459	3.01402e-05	104.633	10.5883	0.000607304
	AcoDREB11	2.8789	0.4017	1	3.6948	0.4088	0.227688	6.117	1.0089	0.0406654	27.9732	2.6468	0.000721511	36.1234	2.0975	9.94348e-05
	AcoDREB14	7.791	1.2002	1	3.6528	0.2912	0.0285505	24.8096	12.7008	0.00528492	106.198	7.6578	0.000221714	137.764	10.8143	0.000281409
	AcoDREB18	12.8808	0.896433	1	1.28019	0.0593463	0.000207458	5.95966	2.32299	0.00319651	14.2801	0.916687	0.336453	14.1051	1.79073	0.573999
	AcoDREB19	1	0.002	1	7.5668	0.8352	0.00141395	21.8136	2.0457	0.000525608	34.182	3.7779	0.000926646	28.1377	3.2028	0.00106334
