# Supplementary material for: Identification and expression analysis of the DREB transcription factor family in pineapple (Ananas comosus (L.) Merr.)
Source: PeerJ. 2020 Apr 28;8:e9006. doi: 10.7717/peerj.9006 (PMC7194095; doi:10.7717/peerj.9006)
Supplement: Supplemental Information 4 [file peerj-08-9006-s004.xlsx]

## Sheet: Sheet1
Table S3 DREB genes ID
Pineapple Gene name	PGD ID	Gene bank ID
AcoDREB01	Aco008968.1	NC_033629.1
AcoDREB02	Aco016696.1	NC_033637.1
AcoDREB03	Aco022517.1	NC_033642.1
AcoDREB04	Aco000059.1	NC_033632.1
AcoDREB05	Aco001600.1	NC_033638.1
AcoDREB06	Aco010173.1	NC_033645.1
AcoDREB07	Aco006004.1	NC_033636.1
AcoDREB08	Aco009985.1	NC_033630.1
AcoDREB09	Aco012835.1	NC_033623.1
AcoDREB10	Aco015162.1	NC_033625.1
AcoDREB11	Aco002673.1	NC_033626.1
AcoDREB12	Aco003376.1	NC_033637.1
AcoDREB13	Aco012243.1	NC_033622.1
AcoDREB14	Aco018023.1	NC_033621.1
AcoDREB15	Aco018980.1	NC_033622.1
AcoDREB16	Aco001190.1	NC_033622.1
AcoDREB17	Aco002824.1	NC_033626.1
AcoDREB18	Aco007650.1	NC_033628.1
AcoDREB19	Aco014268.1	NC_033625.1
AcoDREB20	Aco016346.1	NC_033623.1
