# Supplementary material for: Identification and expression analysis of the DREB transcription factor family in pineapple (Ananas comosus (L.) Merr.)
Source: PeerJ. 2020 Apr 28;8:e9006. doi: 10.7717/peerj.9006 (PMC7194095; doi:10.7717/peerj.9006)
Supplement: Supplemental Information 5 [file peerj-08-9006-s005.xlsx]

## Sheet: Sheet1
Table S4 The protein sequences of 20 AcoDREB genes.
Gene name	Gene ID	protein sequence
AcoDREB01	Aco008968.1	MSLNPSTSTTNINYSPHCDDDAASASASASALYATVSSAPPKRRAGRTKFRETRHPVYKGVRQRGGERWVCEVREPNNGPGGGARSNARIWLGTFPTAEMAARAHDVAALALRGRAACLNFADSPRVLRLPESRDPRDIRKAAAAAAEAFRPPLPTPSACGDSGNGNAAAAARAEIEYSSYAADDGLCDYGMYVDMARGMLIDPPAMWGSGREDESGEDVALWSHSI*
AcoDREB02	Aco016696.1	MDDSTSSSSNGCSPTERSPAAKSPCSSSSSSLHAPAPTPSLKRKAGRKKFRETRHPVYRGVRSRNGGRWVCEVREPHKKSRIWLGTYPTPEMAARAHDVAALALRGEAAPLNFPDSVWKLPRAGSGSADDVRFAAAKAAEMFRPCALHESPPLLKWETSSPAKKLPAPPSTDQGWIGEADEEKVVRPAAVYLDEELVFNMQGLMDDMAKGMMLTPPALRRAFDWDADECAEDWTLWAD*
AcoDREB03	Aco022517.1	MEFFSGGGGESSSPSTSASAETGEYATVSSAPPKRPAGRTKFRETRHPVYKGVRRRGAAGRWVCEVREPNKKSRIWLGTFPTAEMAARAHDVAAIALRGRSACLNFADSATLLPIPPSYATTRDIQRAAAEAAEAFRPPEFSPNSPAAATTPPSDADGMSEFYANNAAGGGGSGSGGNVNVNVIGGGGGGGDEGFSGWMSYDDLDAGMYYASMAEGWFVEPPTSRDGGHSNWDEGDGGCDEVSLWSYSI*
AcoDREB04	Aco000059.1	MAYREGPARGKGGPQNAACEYRGVRQRTWGKWVAEIREPRKRTRIWLGSFATAEEAALAYDEAARRLYGPDAFLNLPHLRAAHPADFAPRPAQRFRFFPNSRSCAALVPPCGLLNLNAQHNVNTIYQKLQELKNNPNSSPIHPPPPLPPPITAATAVTAATAAAAAATTTSLSASSNFTPPSNNDGDDAQIASGGEGERPQIDLREFLQQLGVIGAEGEERAGLSSGTAQPSGTAVESGGGSGGMDSEMALGGADVADEESGGFNWDALEEMRALEDLYHDHPAVLMREESGHEMLQVDDMHEELSLLPISIWDL*
AcoDREB05	Aco001600.1	MVEADQRRGFEMYEQERSRVYLDGQESKQGFLHVENTVKNIDSSQDGSCWSHRVSRKKRPRRTREGPNSVLETIKKWKQQNCQEAYRRIKKAPAKGSKKGCMRGKGGPDNSSCLYRGVRQRTWGKWVAEIREPNRGSRLWLGTFPTAELAARAYDEAARAMYGSLARVNFEGNAKEDSCESTTTSQHESAAKEQNTEVSSPDKANLRAPKVESVDEFKSQSPVVAVAEDKVKEEGSEDVFGLLEPIENLLPGDNNINFDCFNIDEILGMIDAEPMRDGIGLTTSELGQEGIDGNIQYIDPSAFAFPMEFPSDAAAWDFSAQLERELEAALVQEQDQGFADG*
AcoDREB06	Aco010173.1	MQGSEQQQQQKKCCPLRRSRKGCMKGKGGPENQQCPYRGVRQRTWGKWVAEIREPNRGARLWLGTFNTALEAAQAYDSAARNLYGDCARLNLNLNHPNPPQLTSTSPNHQPNTLLCPSTPTYSPPRSADSTTTTTTTTTTTTTTSDSTVPGGGIESPGFFCGVDAGLDDFDDYVTRLPKAEDFGLEGFQEVPLFNDVGFCDTELDRDLMSFDALQLSWCS*
AcoDREB07	Aco006004.1	MTQSGGADSAEPGSKAMSPPSSGAATSPGAPTKRGRGAGSTRHPSYRGVRMRAWGKWVSEIREPRKKTRIWLGTFPTPEMAARAHDAAALCVKGPAAALNFPELAAALPRPATLAPRDVQAAAALAAAMEEPGFASDQLWAVPDGCVPTVFESRLWD*
AcoDREB08	Aco009985.1	MTQSGGADSAEPGSKAMSPPSSGAATSPGAPTKRGRGAGSTRHPSYRGVRMRAWGKWVSEIREPRKKTRIWLGTFPTPEMAARAHDAAALCVKGPAAALNFPELAAALPRPATLAPRDVQAAAALAAAMEEPGFASDQLWAVPDGCVPTVFESRLWD*
AcoDREB09	Aco012835.1	MLIMVDGNCVLNVPRLRWAFRGSETVSSAAAEGGGRIRVSWDLHNWLFRLPDDSAPPPTAFGDAGDAVFVFRFEQDGDGDTNENCGTGEGHFQKKGGDFAERGYFGKRNRKNWSESGGCNNSSNSSSRGRRKKSLLKATSSSSLSSSNSTSSTPTTTSPCPNAPSPPAEKSGSGLKKGGKNSCKREADAVGGGGGGGGESKQKRSKEGKHPVYRGVRMRNWGKWVSEIREPRKKSRIWLGTFPTAEMAARAHDVAALTIKGQSAHLNFPELAPALPRPATASPKDIQAAAALAAAFPAAGDDLPDLLLDLRDGFWFPSSWEDEEDGGGGEFRFEEPLLWEYC*
AcoDREB10	Aco015162.1	MALTGQPRSSLSEPETSANSASSSHSSLSSPSSTSSLARMLQNPATQLFKEEGGGGGAPIRRRVRDSTNKHPAYRGVRMRNWGKWVSEIREPRKKSRIWLGTFPTAEMAARAHDAAARAVKGAAAVLNFPELADSLPRPATLAPRDVQAAAALAAAMDPAPLDAAPAPAAPAPAPAAEEDEELGEIVELPRLGEEEDDDEEGARWCRVGSGEPELAFDDSFDPWAPWTVGADGEVDDDAAYGFLASDGCVPTTFGRGFLWN*
AcoDREB11	Aco002673.1	MGGLNNSSSSSSSSSSSNSNNISSSSSSGSSSSCRRKQYRGVRMRSWGSWVSEIRAPNQKTRIWLGSYSTPEAAARAYDAALLCLKGASSSASLNFPAVSLRYHRLLPAASTTALSPKSIQRVAAAAAAAADAAFSLPSPQTSDGNAVIENRPSERTLDADVDGAGNDPLIELEAFFQSPKCMDYMLNPCAFFAGSDQFTQECCDEEDEISLWSFC*
AcoDREB12	Aco003376.1	METQVATQYRGVRKRKWGKWVSEIREPGKKTRIWLGSFESAEMAAAAHDVAALRLRGREARLNFPEAADRLPRPKSSDPVDIRSAALEAARRVRALGPEPCCSLSGPSRAGSEWEYIGNDELGLDSPKMWAELAEAMLVAPPMWAHGDADVEDWVQGSLWDALL*
AcoDREB13	Aco012243.1	MTPTPTGAAAGASSCRQHRRRLFRGVRMRKWGTWVSEIRVPRSQSRIWLGSFDHPEKAARAYDAAVYCLRGAAGNFNFPGEPQPDITEEKRRTLTPDDIKAIAACHAASASVVIKDGDDVGFSDERKLQQLIPTSASSSLVRDACSSIK*
AcoDREB14	Aco018023.1	MSRAMAADGDGDGDCERKKYKGVRRRRWGKWVSEIRVPGTRHRLWLGSYATAEAAAVAHDAAVFFLRGPDAAEGFNFPESAEGCYWRRATSAGGQLSPQSVQRVASDAGMAADAGLAVGRAEERELQQQQQHQHQQEQNQQQQLVQQPAVLTGEYWGPAGGDEWWSDYGVGGF*
AcoDREB15	Aco018980.1	MTKSAAEEAAAAAAERRYKGVRRRKWGKFVSEIRLPNSRNRIWLGSYDTPEKAARAFDAAAVCLRGPLGSGRLNFPDSPPQLSSSATAAMTHQQIREAAASHANRAARATTQQQQTAAAESPSTEEASDGMTPESEEAVDWSYMDLISPVGAKAAAKTAAAAAAAAAAALRIPGRFFGASN*
AcoDREB16	Aco001190.1	MAAAIDMYNPQSVFSSDPFNGELMKALEPFLRRAASPSSPSPSPSPLSSLSSLSSDSTPQTTTSSSFPSPSPYSSYYSPLALSSPHQSQSSTFYHTEGTVGLQPALERVRPVGLAQLSAAQIECIQAQLHYQQLQQGLGPRAQPMKQQSAPRPAKLYRGVRQRHWGKWVAEIRLPRNRTRLWLGTFDTAEDAALAYDRAAFRLRGDSARLNFPDLRHRHLPLPLPSAAVDAKLHAICQTLAPNPEPEPEPELESSSEASLASSPVSEIQNLDFTEAPWDESESLALAKYPSWDIDWDSILS*
AcoDREB17	Aco002824.1	MAAAIDMCNSWGVTYSDPFSEELMKALEPFINGASTISSSSSSSSPYSPSPSPSPSPLTYGELTSSTPSPPPPLSSPYPFPPVSSPLFYSPSPSSSSSSSPFSHQNPIFEYGAGAYVGPVGLNQLSPAQVEQIQAQIQFEQRQRQQQQPQQQRLLAPRGPGYLGPRAQSMKHGAAAAAAAPGGKATKLYRGVRQRHWGKWVAEIRLPKNRTRLWLGTFDTAEEAALAYDKAAFRLRGDFARLNFPDLRHRHLPSSSPAPLLASVDAKLQAICQTLASTSSSAPAPKTGRSAAAAAAAPPSSSAPASAAAEESSSSSDGEAEDSSSPVSEMETLDFTEAPWDESESFFLRKYPSYEIDWDSILSQN*
AcoDREB18	Aco007650.1	MREESRRWARKGQRAHARSIASWTAEREGPRKSSEDCNGDGDGDGDSVRGRRVKGKAVLDIPTVAHGAEKLESSPRPSKKIKSPDHDLHRPNLICRSRSILFPSLPISPFAFEAPRSDSDARALLQQQMISFGAVNSPPFHSGLVSDQLVLLRRWSEALNLSPRGGAGLMQQFGTPPRPPQKLYRGVRQRQWGKWVAEIRLPRSRSRRLWLGTFDTAEDAALAYDREAFKLRGESARLNFPGLFLCSASAPSSSLSSSSAPAPSAPSTVAVEGRAESVGGTAETDGGGSDQLAWGEGEVEAWFSAWGPGSSVWDDVDWANRLLRQSRLAAAAESESVRSDAAPAASATTAAAAAASQDINSASSSDPTDTVTT*
AcoDREB19	Aco014268.1	MVQSKKFRGVRQRHWGSWVSEIRHPLLKRRVWLGTFETAEEAARAYDEAAVLMSGRNAKTNFPVNKTPSGDAQPCRENLNSSAASATNLSEILSAKLRKCCKTPSPSLTCLRLDTEKSHIGVWQKRAGARADSNWVMTVQLSKVGEQVTCEATTTTTTTTPPVSSASEASNVTQGSTVTSSAMIDEEESIALQMIEELLNRNCPVPPPSRAEPLQSAVDNL*
AcoDREB20	Aco016346.1	MDRQRRSGGGGGGSRLGGRAKGKAVGSERSPTPVFDEASAPSPRPLKKIRSPERSLRSSASFSDDSAAAAYSSSSSPSSVSSASSSVSNLMNSPSFRPIFPFACEASHHHHHPLLPLFQTTPPLPQQMISFSHNPMYPTGAASYPPYLFSGNAASTITTTTATTTTTTTTTAIQQQQQQQQQQQQLMLLRYWSEALNLSPRGGGGHVAMMSRLAGGALPPMYASGLFRPPMLPGVPAPANKLYRGVRQRHWGKWVAEIRLPRNRTRLWLGTFDTAEDAALAYDREAFKLRGENARLNFPELFLGKSGRCDADGAASSSVEKIQEPPPPTESEPMDSAEETAAAETEESLSKEEESPPSEAIAAEEAVHDGGGELVWGEAEEAWFSAWGPGSSVWDDVDG…
