# Supplementary material for: Identification and expression analysis of the DREB transcription factor family in pineapple (Ananas comosus (L.) Merr.)
Source: PeerJ. 2020 Apr 28;8:e9006. doi: 10.7717/peerj.9006 (PMC7194095; doi:10.7717/peerj.9006)
Supplement: Supplemental Information 6 [file peerj-08-9006-s006.xlsx]

## Sheet: Sheet1
Table S5 DREB family members raw data in pineapple.
Chromosome		Start position	End position	Score	Strand	Phase	Attributes
LG09	gene	12532806	12533489	.	-	.	ID=AcoDREB01;Name=AcoDREB01
LG09	mRNA	12532806	12533489	.	-	.	ID=AcoDREB01.1;Name=AcoDREB01.1;pacid=33034231;longest=1;Parent=AcoDREB01
LG09	CDS	12532806	12533489	.	-	0	ID=AcoDREB01.1.CDS.1;Parent=AcoDREB01.1;pacid=33034231
LG17	gene	191641	192357	.	-	.	ID=AcoDREB02;Name=AcoDREB02
LG17	mRNA	191641	192357	.	-	.	ID=AcoDREB02.1;Name=AcoDREB02.1;pacid=33043593;longest=1;Parent=AcoDREB02
LG17	CDS	191641	192357	.	-	0	ID=AcoDREB02.1.CDS.1;Parent=AcoDREB02.1;pacid=33043593
LG22	gene	6333171	6333920	.	+	.	ID=AcoDREB03;Name=AcoDREB03
LG22	mRNA	6333171	6333920	.	+	.	ID=AcoDREB03.1;Name=AcoDREB03.1;pacid=33045753;longest=1;Parent=AcoDREB03
LG22	CDS	6333171	6333920	.	+	0	ID=AcoDREB03.1.CDS.1;Parent=AcoDREB03.1;pacid=33045753
LG12	gene	5065638	5067899	.	+	.	ID=AcoDREB04;Name=AcoDREB04
LG12	mRNA	5065638	5067899	.	+	.	ID=AcoDREB04.1;Name=AcoDREB04.1;pacid=33043152;longest=1;Parent=AcoDREB04
LG12	CDS	5065638	5065652	.	+	0	ID=AcoDREB04.1.CDS.1;Parent=AcoDREB04.1;pacid=33043152
LG12	CDS	5066967	5067899	.	+	0	ID=AcoDREB04.1.CDS.2;Parent=AcoDREB04.1;pacid=33043152
LG18	gene	9400576	9404316	.	-	.	ID=AcoDREB05;Name=AcoDREB05
LG18	mRNA	9400576	9404316	.	-	.	ID=AcoDREB05.1;Name=AcoDREB05.1;pacid=33029007;longest=1;Parent=AcoDREB05
LG18	CDS	9404052	9404101	.	-	0	ID=AcoDREB05.1.CDS.1;Parent=AcoDREB05.1;pacid=33029007
LG18	five_prime_UTR	9404102	9404316	.	-	.	ID=AcoDREB05.1.five_prime_UTR.1;Parent=AcoDREB05.1;pacid=33029007
LG18	CDS	9403363	9403429	.	-	1	ID=AcoDREB05.1.CDS.2;Parent=AcoDREB05.1;pacid=33029007
LG18	CDS	9402415	9402464	.	-	0	ID=AcoDREB05.1.CDS.3;Parent=AcoDREB05.1;pacid=33029007
LG18	three_prime_UTR	9400576	9400905	.	-	.	ID=AcoDREB05.1.three_prime_UTR.1;Parent=AcoDREB05.1;pacid=33029007
LG18	CDS	9400906	9401764	.	-	1	ID=AcoDREB05.1.CDS.4;Parent=AcoDREB05.1;pacid=33029007
LG25	gene	3102765	3103427	.	-	.	ID=AcoDREB06;Name=AcoDREB06
LG25	mRNA	3102765	3103427	.	-	.	ID=AcoDREB06.1;Name=AcoDREB06.1;pacid=33041719;longest=1;Parent=AcoDREB06
LG25	CDS	3102765	3103427	.	-	0	ID=AcoDREB06.1.CDS.1;Parent=AcoDREB06.1;pacid=33041719
LG16	gene	9780663	9781136	.	+	.	ID=AcoDREB07;Name=AcoDREB07
LG16	mRNA	9780663	9781136	.	+	.	ID=AcoDREB07.1;Name=AcoDREB07.1;pacid=33034501;longest=1;Parent=AcoDREB07
LG16	CDS	9780663	9781136	.	+	0	ID=AcoDREB07.1.CDS.1;Parent=AcoDREB07.1;pacid=33034501
LG10	gene	1992629	1993102	.	+	.	ID=AcoDREB08;Name=AcoDREB08
LG10	mRNA	1992629	1993102	.	+	.	ID=AcoDREB08.1;Name=AcoDREB08.1;pacid=33046925;longest=1;Parent=AcoDREB08
LG10	CDS	1992629	1993102	.	+	0	ID=AcoDREB08.1.CDS.1;Parent=AcoDREB08.1;pacid=33046925
LG03	gene	15051238	15052266	.	-	.	ID=AcoDREB09;Name=AcoDREB09
LG03	mRNA	15051238	15052266	.	-	.	ID=AcoDREB09.1;Name=AcoDREB09.1;pacid=33031719;longest=1;Parent=AcoDREB09
LG03	CDS	15051238	15052266	.	-	0	ID=AcoDREB09.1.CDS.1;Parent=AcoDREB09.1;pacid=33031719
LG05	gene	1705173	1705958	.	-	.	ID=AcoDREB10;Name=AcoDREB10
LG05	mRNA	1705173	1705958	.	-	.	ID=AcoDREB10.1;Name=AcoDREB10.1;pacid=33053926;longest=1;Parent=AcoDREB10
LG05	CDS	1705173	1705958	.	-	0	ID=AcoDREB10.1.CDS.1;Parent=AcoDREB10.1;pacid=33053926
LG06	gene	10539056	10539706	.	+	.	ID=AcoDREB11;Name=AcoDREB11
LG06	mRNA	10539056	10539706	.	+	.	ID=AcoDREB11.1;Name=AcoDREB11.1;pacid=33040559;longest=1;Parent=AcoDREB11
LG06	CDS	10539056	10539706	.	+	0	ID=AcoDREB11.1.CDS.1;Parent=AcoDREB11.1;pacid=33040559
LG17	gene	2435249	2435743	.	-	.	ID=AcoDREB12;Name=AcoDREB12
LG17	mRNA	2435249	2435743	.	-	.	ID=AcoDREB12.1;Name=AcoDREB12.1;pacid=33044008;longest=1;Parent=AcoDREB12
LG17	CDS	2435249	2435743	.	-	0	ID=AcoDREB12.1.CDS.1;Parent=AcoDREB12.1;pacid=33044008
LG02	gene	73387	74171	.	-	.	ID=AcoDREB13;Name=AcoDREB13
LG02	mRNA	73387	74171	.	-	.	ID=AcoDREB13.1;Name=AcoDREB13.1;pacid=33037289;longest=1;Parent=AcoDREB13
LG02	CDS	73730	74171	.	-	0	ID=AcoDREB13.1.CDS.1;Parent=AcoDREB13.1;pacid=33037289
LG02	CDS	73387	73394	.	-	2	ID=AcoDREB13.1.CDS.2;Parent=AcoDREB13.1;pacid=33037289
LG01	gene	20359723	20360244	.	+	.	ID=AcoDREB14;Name=AcoDREB14
LG01	mRNA	20359723	20360244	.	+	.	ID=AcoDREB14.1;Name=AcoDREB14.1;pacid=33051369;longest=1;Parent=AcoDREB14
LG01	CDS	20359723	20360244	.	+	0	ID=AcoDREB14.1.CDS.1;Parent=AcoDREB14.1;pacid=33051369
LG02	gene	10499315	10499860	.	+	.	ID=AcoDREB15;Name=AcoDREB15
LG02	mRNA	10499315	10499860	.	+	.	ID=AcoDREB15.1;Name=AcoDREB15.1;pacid=33037574;longest=1;Parent=AcoDREB15
LG02	CDS	10499315	10499860	.	+	0	ID=AcoDREB15.1.CDS.1;Parent=AcoDREB15.1;pacid=33037574
LG02	gene	13530546	13531451	.	-	.	ID=AcoDREB16;Name=AcoDREB16
LG02	mRNA	13530546	13531451	.	-	.	ID=AcoDREB16.1;Name=AcoDREB16.1;pacid=33037252;longest=1;Parent=AcoDREB16
LG02	CDS	13530546	13531451	.	-	0	ID=AcoDREB16.1.CDS.1;Parent=AcoDREB16.1;pacid=33037252
LG06	gene	11885237	11886334	.	-	.	ID=AcoDREB17;Name=AcoDREB17
LG06	mRNA	11885237	11886334	.	-	.	ID=AcoDREB17.1;Name=AcoDREB17.1;pacid=33040481;longest=1;Parent=AcoDREB17
LG06	CDS	11885237	11886334	.	-	0	ID=AcoDREB17.1.CDS.1;Parent=AcoDREB17.1;pacid=33040481
LG08	gene	962022	963979	.	-	.	ID=AcoDREB18;Name=AcoDREB18
LG08	mRNA	962022	963979	.	-	.	ID=AcoDREB18.1;Name=AcoDREB18.1;pacid=33035677;longest=1;Parent=AcoDREB18
LG08	CDS	963896	963979	.	-	0	ID=AcoDREB18.1.CDS.1;Parent=AcoDREB18.1;pacid=33035677
LG08	CDS	962022	963059	.	-	0	ID=AcoDREB18.1.CDS.2;Parent=AcoDREB18.1;pacid=33035677
LG05	gene	128578	129975	.	+	.	ID=AcoDREB19;Name=AcoDREB19
LG05	mRNA	128578	129975	.	+	.	ID=AcoDREB19.1;Name=AcoDREB19.1;pacid=33054799;longest=1;Parent=AcoDREB19
LG05	five_prime_UTR	128578	128826	.	+	.	ID=AcoDREB19.1.five_prime_UTR.1;Parent=AcoDREB19.1;pacid=33054799
LG05	CDS	128827	128906	.	+	0	ID=AcoDREB19.1.CDS.1;Parent=AcoDREB19.1;pacid=33054799
LG05	CDS	129066	129651	.	+	1	ID=AcoDREB23.1.CDS.2;Parent=AcoDREB19.1;pacid=33054799
LG05	three_prime_UTR	129652	129975	.	+	.	ID=AcoDREB19.1.three_prime_UTR.1;Parent=AcoDREB19.1;pacid=33054799
LG03	gene	10461754	10463145	.	+	.	ID=AcoDREB20;Name=AcoDREB20
LG03	mRNA	10461754	10463145	.	+	.	ID=AcoDREB20.1;Name=AcoDREB20.1;pacid=33031856;longest=1;Parent=AcoDREB20
LG03	CDS	10461754	10463145	.	+	0	ID=AcoDREB20.1.CDS.1;Parent=AcoDREB20.1;pacid=33031856
