# Supplementary material for: Identification and expression analysis of the DREB transcription factor family in pineapple (Ananas comosus (L.) Merr.)
Source: PeerJ. 2020 Apr 28;8:e9006. doi: 10.7717/peerj.9006 (PMC7194095; doi:10.7717/peerj.9006)
Supplement: Supplemental Information 8 [file peerj-08-9006-s008.xlsx]

## Sheet: Sheet1
Table S7 The protein sequences of OsDREB genes.
Gene ID	protein sequence
Os01g04020	MAPSKQQQMLLKKVMAKKPKTKRLSGFGLKPSAAFSRPHVPSAAASLQPSRRVRVVFEDPDATDSDSDDDEDAGAASKKRYFELFIGKPASSTKQASPASTVAAYANIGKVGSTCYRGVRLRKWGKWAAEIRNPFTGHREWLGTFDTADAASAAYQSASRNFAEEKRRRGVASSASPASSATPTPTASSSSSTSAAPFAHPSPSSVLEATKPAPKPESPPLPEQAATPLLVEATNETAELPDDPEFYKDILRGLQLPDIDPMDFRAGLDALDISDVPAYMNGEQDVLFTEDMLLGDFAEEDDLDLDDIGDDFCEDFPEIPSGYDFGRGDMFRQVDFCV*
Os05g25260	MRPPAMSPADSLAAGRSRRVGASMPRPKRVRVYFVDADATDTDSSGDERSRPRVREVIDIDVGAASPAPAPKHPRRLVPTATAALARRRAGMAASRRFRGVRRRPWGRFSAEIRDPSLQKRLWLGTFDTAEEAAAVYDDAALRIKGSHAVTNFPSDSDTPSAKAKQMKLHPRRHTTPDKTPSSSTAAAAKASVPDPTPAPPEEDRANDSSFNPFASPTSVLRYAAADEVTAPSFEHLLVELGDLSAPPPSTKAAEFDWLPWWEGEDFVTAGLTASNAVSVK*
Os08g45110	MILIHRYNQASMEMDIGEGESCCGRRKQQQQQNISSSKSRKCCPLRRSRKGCMKGKGGPENQRCPFRGVRQRTWGKWVAEIREPNRGARLWLGTFNTALDAARAYDSAARALYGDCARLNLLLAAATAGAPPAAATPSVATPCSTNDDSNNSSSTTHQQQLTTMLQLDDDNYTLQPSSSDQEDFETYVTRLPKAEDFGLEGFQEVPLDVLDEAGGGISIWDLSICPADFMATAATTTAKSS*
Os03g05590	MEDDKSKEGKSSSSYRGVRKRPWGKFAAEIRDPERGGARVWLGTFDTAEEAARAYDRAAFAMKGATAMLNFPGDHHHGAASRMTSTGSSSSSFTTPPPANSSAAAGRGGSDRTTDKVELECLDDKVLEDLLAETNYRDKNY*
Os05g27930	MTVDQRTTAKAIMPPVEMPPVQPGRKKRPRRSRDGPTSVAETIKRWAELNNQQELDPQGPKKARKAPAKGSKKGCMKGKGGPENTRCDFRGVRQRTWGKWVAEIREPNQQSRLWLGTFPTAEAAACAYDEAARAMYGPMARTNFGQHHAPAASVQVALAAVKCALPGGGLTASKSRTSTQGASADVQDVLTGGLSACESTTTTINNQSDVVSTLHKPEEVSEISSPLRAPPAVLEDGSNEDKAESVTYDENIVSQQRAPPEAEASNGRGEEVFEPLEPIASLPEDQGDYCFDIDEMLRMMEADPTNEGLWKGDKDGSDAILELGQDEPFYYEGVDPGMLDNLLRSDEPAWLLADPAMFISGGFEDDSQFFEGL*
Os05g37640	MEPNYSDYHPNSVPFDAYYEHGHGHLDDHGHGHHHLIPAHPEPSYSYGNWSFLHADATATSSSESSSASASSGAAHIVGASGPSASFVRQLHFGGEYYDDDAADISALMEAASISCWTTNGGAGASTSQTTGLEGVEVMRRAAAPAPDNGSSDKEEAARPLIGVRKRPWGKYAAEIRDSTRNGARVWLGTFNTPEQAALAYDQAALSVRGPGAVLNYPLHRVRESLRTLELGAAAAASESPVLTLKRRHRIRKRSTTKKALAGKEADEAPATTSSEGKKKRQVNTTSHSHDGAWRRHLLSSGRLSMEGSTAAGGHGGLAGGRGEAAGSNVRAADDDEDGEAAAGSSVHVANDDDDGSEAAAVSSMHAADNDDEAVAGSGVRMTTTTAARRRSGAG*
Os01g07120	MLFRFVSCNVQLCGIIELPHWVRKKRTRRKSDGPDSIAETIKWWKEQNQKLQEENSSRKAPAKGSKKGCMAGKGGPENSNCAYRGVRQRTWGKWVAEIREPNRGRRLWLGSFPTALEAAHAYDEAARAMYGPTARVNFADNSTDANSGCTSAPSLMMSNGPATIPSDEKDELESPPFIVANGPAVLYQPDKKDVLERVVPEVQDVKTEGSNGLKRVCQERKNMEVCESEGIVLHKEVNISYDYFNVHEVVEMIIVELSADQKTEVHEEYQEGDDGFSLFSY*
Os02g10760	MVQPKKKFRGVRQRHWGSWVSEIRHPLLKRRVWLGTFETAEEAARAYDEAAVLMSGRNAKTNFPVQRNSTGDLATAADQDARSNGGSRNSSAGNLSQILSAKLRKCCKAPSPSLTCLRLDPEKSHIGVWQKRAGARADSNWVMTVELNKEVEPTEPAAQPTSTATASQVTMDDEEKIALQMIEELLSRSSPASPSHGEGEGSFVI*
Os02g43940	MEAAAIHAPTTTTSSDSGSCVTNGTREKREISKHKQLKRKRSTSPAPPPGCGGGQGQEAAVETDADAGAAGEEESSSCGGAGAGEGERKRGDAGRHPSYRGVRRRSWGKWVSEIREPRKKSRIWLGTFPTAEMAARAHDVAALAIKGRAAHLNFPSLAHTLPRPASTSPSDIQAAAALAAAAAATDQCESSSSAVAAATATDAEAAESTSSAAASPCAATSSVEENALFDLPDLLLDLSDGLWCSPVWTTAPADQYDAGDDGDDAAAPLLWAEQCWMDAPAAPVQPD*
Os04g46410	MEQEQVMSQESNSCTCSSSSNDASSAACSSLNASSPSSVDSGSAGGGGGGKKRPRSDHLKHPTYRGVRMRSWGKWVSEIREPRKKSRIWLGTFDTAEMAARAHDVAALAIKGRTVHLNFPDLAHLLPRAASASPKDVQAAAALAAATASPAPALSPTPCHDVDAAADDEPEPAEPEQATAPVCIVENGTLQQDGGTGLDYTYFTMPDALLEFGFTLPPPPPPYYCGSPWDDDADDFFFGEPLVLWEH*
Os10g41130	MAMAKELQETSSSSSSSAASTSSCSSAVTDAWSSPARPNAVAGGKRKKEVVGEADEAAGGGAGEEEEEEAEAAAAGKSSAATKKRKRSSDGKHPVYRGVRMRAWGKWVSEIREPRKKSRIWLGTFPTADMAARAHDVAALAIKGRAAHLNFPDLAGVLPRAASASPKDVQAAAALAAAFTTSPSSSPSSSLSADDVAPCVVHADADEQPAAAAKNDDDDGSTTAPVAAAAAAAAADEQQLFDLPDLLFDIQDGPFGFPAMWAPLADVDEVNAELRLEEPLLWDLGVTDA*
Os02g43820	MDFSGDIDDLISLQLLHDQLLGVEADACLPVAVHHDGVAAFAEHQQGFHPAAFLPQQPMTMTPAGYVDMANDQYLGAHAAAGEAEAVYRAAAAEPVMIRFGGEVSPVSDPRRPPLTISLPPTSHAWAAAEAVHPAALLQAQTAAAAADPNDFRKYRGVRQRPWGKFAAEIRDPKKRGSRVWLGTYDTAIEAARAYDRAAFRMRGAKAILNFPNEVGSRGADFLAPPPPPPPPTTSTHGKRKRHETAAADPDVEVIGESSKSVKTETYTSPASSSLASTTTSTVTSSSTSPSPSSEAAACGGGGGELFVPPMPSSWSWDQLEGFFGILSPLSPHPQMGFPEVAVN*
Os04g46250	MDFHHGDADDFALEFIREHLLGVDGATATATEPADLEVVEPAAAYPPMSWQEQRQQEQHGCHVELTDEHLESAPAAEAAAAFRTAPAQPAAEVMIKFGGEPSPVRPSSSLTISLPPSSFGSWASAAAPAAAAVEDFRKYRGVRQRPWGKFAAEIRDPKRRGSRVWLGTYDTPVEAARAYDRAAFRMRGAKAILNFPNEVGTRGAELWAPPPPPPAHSAAASTTNKRKRQPSEDPDDGVEVIGVVSKAVKTEAPTSNSSSLSSSLTSRDTTPATSSAGAEHAGAAAESSPATPSSWSWEQYWEALLGGLPPLSPLSPHPALGFPQLTVN*
Os06g11940	MAYISTSSTDHSLSCMRMQTKNTAAPAPEKKYKGVRLRQWGKWVAEIRLPNSRERVWLGSYDTPEKAARAFDAAFVFLRGAGAADAAGLNFPDSPLPVVARTRDLREVYAFAVSHANRPPPVAGETAATALAAMAALEHNEVRENIAPSSPLSAVQVAAPPAGSFDWSQLMANSPPLYSPIVIGSHAYDDLAVWPTTQPVEEFSEEDNENEGATSDELWSFDV*
Os04g46400	MEADASHTPTTSSSVSVSFSSSSLSTSSSTSSLVDNGAQDRPKSSKPKHAAKKRKRAAAEEPANAAHGAGEDTSSCSTDDNAAASGKAQAGGGGGGVDSSSTCTAASAPRSGFKHPSYRGVRRRSWGKWVSEIREPRKKSRIWLGTFPTAEMAARAHDVAALAIKGRNAHLNFPDSAHELPRPESTSPADIQAAAAKAAAEVRCEEESSPSSSPTAEQPEEEAACPDTVHADGGQDNALFDLPDLLLDLRDGLWWSPVWPAALAAEEYDGGDAVVLNEPLLWAE*
Os02g34270	MAALFEAAETAAIVAALTRVIADGGRGGSGAGVPPPAPSLVVPPLAGTGGGRRVDVAREEEMVGVVSAGDHTGEASVAAAGVVVAAPATARRYRGVRRRPWGKWAAEIRDPRKAARVWLGTFRTTEDAARAYDAAVLRFRGRRAKLNFPEEASRPRRPWKGHDVDHMSCSPPSIANARFLGSWIFGPPPPSRSVAAATTTLLGGSHGSNGADNGRE*
Os04g34970	MALSEPDLAAETEAIVSALTHVVAYGGGGPPPSEETAASAVTRTAPWRADGARQGAVPAARKYRGVRRRPWGKWAAEIRDPHRAARVWLGTFATAEDAARAYDAAALRFRGGRARLNFPEDAAAADERRATDAAAAAAAASSAPAALLESQPGDVADCLDYSRILAGAPERPTSSTVPDGFFGGGGNGRFLHSWSIGTSPSPSGSGSGGAGGGGGGGGGGAPVRPLFHGGNGWEQRGDSAYNGF*
Os11g13840	MEVVVMQNGGGGGGGEMAGQYRGVRKRKWGKWVSEIREPGKKTRIWLGSFESPEMAAVAHDVAALRLRGRDARLNFPAIAHRFRRPDTAEPGDVRAAALEAAAQVRFTPDLLVVAGGDDARRRCCSAGEAEAAAVAAAAWEWDVVVGGGGDELEAKSPNMWAELAEAMLMAPPVWEGGGETDNDEWAQQAASLWDPSVWDY*
Os01g66270	MSRAECGGGEEEERCRYRGVRRRRWGKWVSEIRVPGTRERLWLGSYATPEAAAVAHDTAVYFLRGGAGDGGGGGATLNFPERAAATYGGGAAVARLSPRSVQRVASDAGMAADAQLVAARDAAPAPAPATAYARPDHCAGATTARHDELARRGMYGAHAHAAGANARTSGERQLVCAEEISVDDMEILM*
Os09g35020	MDMAGHEVNSSSSSSGAESSSSSSGRQQYKKRPAGRTKFRETRHPVYRGVRRRGGAGRWVCEVRVPGKRGARLWLGTYVTAEAAARAHDAAMIALRGGAGGGGAACLNFQDSAWLLAVPPAAPSDLAGVRRAATEAVAGFLQRNKTTNGASVAEAMDEATSGVSAPPPLANNAGSSETPGPSSIDGTADTAAGAALDMFELDFFGEMDYDTYYASLAEGLLMEPPPAATALWDNGDEGADIALWSY*
Os06g06540	MVEVIVEKKARRIVRGRWHVEASNEAAAAAPAVAAPAPRVVRVLCRDHDATDSSGDDDGEDDAPRRARLLVHEIHVARQPVAMSPAAASSSQRRRVGPMKRTESAVDATMDATAAAPERKFRGVRKRPWGKYGAEIRVSQQSARVWLGTFDTAEEAARVYDHAALRLRGPSATTNFPMTPAAPSPPPSRATYAGAASGYDESSDESQLVGSPVSVLRPMPARATAKKEAKEEDDSAPDILGISAGDGLISPFTCDVLNFPPPDEDMFGGGISFGEPTPPPMVFDDDCMARLGHAPNDDEHPVTSSSFLDGDLGDLPSWTEVDGFFSDVGGDDLFAAEPFPAL*
Os08g43200	MEKNTTAMGQLMSSSATTAATATGPASPKRPAGRTKFQETRHPVFRGVRRRGRAGRWVCEVRVPGSRGDRLWVGTFDTAEEAARAHDAAMLALCGASASLNFADSAWLLHVPRAPVASGHDQLPDVQRAASEAVAEFQRRGSTAATATATSGDAASTAPPSSSPVLSPNDDNASSASTPAVAAALDHGDMFGGMRTDLYFASLAQGLLIEPPPPPTTAEGFCDDEGCGGAEMELWS*
Os09g35030	MCGIKQEMSGESSGSPCSSASAERQHQTVWTAPPKRPAGRTKFRETRHPVFRGVRRRGNAGRWVCEVRVPGRRGCRLWLGTFDTAEGAARAHDAAMLAINAGGGGGGGACCLNFADSAWLLAVPRSYRTLADVRHAVAEAVEDFFRRRLADDALSATSSSSTTPSTPRTDDDEESAATDGDESSSPASDLAFELDVLSDMGWDLYYASLAQGMLMEPPSAALGDDGDAILADVPLWSY*
Os08g43210	MCTSKLEEITGEWPPPALQAASTTSSSEPCRRLSPPSSKRPAGRTKFHETRHPVFRGVRRRGRAGRWVCEVRVPGRRGCRLWLGTFDAADAAARAHDAAMLALRGRAAACLNFADSAWLLAVPPPATLRCAADVQRAVARALEDFEQRESSSSVFPLAIDVVAEDAMSATSEPSAASDDDAVTSSSSTTDADEEASPFELDVVSDMGWSLYYASLAEGLLMEPPASGASSDDDDDAIVDSSDIADVSLWSY*
Os09g35010	MEVEEAAYRTVWSEPPKRPAGRTKFRETRHPVYRGVRRRGGRPGAAGRWVCEVRVPGARGSRLWLGTFATAEAAARAHDAAALALRGRAACLNFADSAWRMPPVPASAALAGARGVRDAVAVAVEAFQRQSAAPSSPAETFANDGDEEEDNKDVLPVAAAEVFDAGAFELDDGFRFGGMDAGSYYASLAQGLLVEPPAAGAWWEDGELAGSDMPLWSY*
Os02g45420	MADLTEHPSPTAPPQVQTAGLPAAASPGPASPHSPSEQGDKTAPGAATASTMTTASSGEPSPRSSGKHAFYRGIRCRSGKWVSEIREPRKARRIWLGTYPTAEMAAAAYDVAARALRGADAVLNFPGATASRPVPASASPADIRAAAAAAAAAAAHLERPHGPTGTAYPATAAAEHHQQQQQQQYGSGSPAADDVSGYPPMEGGIGNDDFMDEEAIFELPQLLRNMAAGMMMSPPRLSPTTSDVSPEPSEAGESLWSYRDP*
Os04g46440	MDDSHDLASPTSPDTASSSSSSTSTSSSSATVAPKKRPRNDGRHPTYRGVRMRSWGKWVSEIREPRKKSRIWLGTFATAEMAARAHDVAALAIKGRTAHLNFPDLAHLLPRPATAAPKDVQAAALLAAAAADFPSVSVDANAKSPDTCSVASAASPQPPPPDAEADPDSTLFDLPDLLLDLRYETSSSLSCGASWAVDDDVAGGVVFRLEEPMLWDY*
Os05g49700	MDASLRTLPPAIFPGEVRSAVSSLLLSPGGSALDTVFSHLPPPVTIPPLGSSVYYRQSELLRHFAASQAAQAQSATAAASSSSAAAAGLDDGAPRKLYRGVRQRQWGKWVAEIRLPQNRVRVWLGTYDSPETAAHAYDRAAFKLRGEYARLNFPGVMDGRDCPDNLRQLRDAVDAKIQAIRVRMARKRARARRQREESKKSQRAEDAKAATPSRPVASERAASETTTTTTTTSSSYGSPDGVLSMSAASVDGDCPLERMPSFDPELIWEMLNF*
Os02g43970	MDDSSFGSEPTTSSSGGEAPASPPSTASSSSDGAGGKKKRPRKDGHHPTYRGVRMRSWGKWVSEIREPRKKSRIWLGTFATAEMAARAHDVAALAIKGRAAHLNFPDLAHELPRPATAAPKDVQAAAALAAAADFPASSANAGASNNPDGSDDASAGSASPPPPPDAADDALFDLPDLLLDLRYGPPSSGLSCASSWEDEVGLISGAGAAAAGVFRLEEPLLWEY*
Os10g38000	MEQRAAAAAQQRQGRRQSAAACGIRRARAETRHPVYRGVRFRAGKWVSEIRELRKPSRIWLGTYATPEMAAAAYDAAALALRGRGAALNFPDAARSRPAPASASADDVRAAATAAAAAMAHQEEDDDSRRQLEDGGGGGGVVDEDDVLEMPRLMVSMAEGLMISPPPVMLGLQADGGGIMDEGGGVVRLWDHS*
Os01g64790	MTVAGASELMSGYYQAQEMSTMVSALARVVAGGGGGGGDGDGDQWAWSSPSPSSSAAAAAARGVQERRREEQAMHELAGYACGGAPSPEFAGSEQSSDTQSASAATMDEHHSPVGGGGNAEGPDTPRRRYRGVRQRPWGKWAAEIRDPHKAARVWLGTFETAEAAARAYDEAALRFRGSRAKLNFPEDARLYPTAATTTTAAPPPAPVAAASPSAAIYPGASQSAEYLRYQMLLQGRLTTATPNQGTLLPFYGGGGGGGSMTNPYGGGGGGAMSGFLGSYYSFPTPSVSVATVPSSTSSAPGNYYSSHGGSHQSMSAAEEWNWENALVYPATAASWSESSYHHHPPPPHTQ*
Os05g32270	MESESEQKRETRYTGAYDDEEAAARAYDLAALKYWGAGTQINFPVSDYARDLEEMQMISKEDYLVSLRRKSSAFSRGLPKYRGLPRQLHNSRWDASLGHLLGNDYMSLGKDITLDGKFAGTFGLERKIDLTNYIRWWLPKKTRQSDTSKMEEVTDEIRAIESSMQRTEPYKFPSLGLHSNSKPSSVVLSACDILSQSDAFKSFSEKSTKLSEECTFSKEMDEGKTVTPVPATGHDTTAVNMNVNGLLVQRAPYTLPSVTAQMKNTWNPADPSADPLFWTNFILPASQPVTMATIATTTFAKNEVSSSDPFHGQE*
Os04g52090	MAPRNAAEAVAVAVAEGGGAGMEPRFRGVRKRPWGRYAAEIRDPARKARVWLGTFDTAEAAARAYDSAALHFRGPKAKTNFPVAFAHAHHHAPPPPLPKAAALAVVSPTSSTVESSSRDTPAAAPVAAAAKAQVPASPSLDLSLGMSAMVAAQPFLFLDPRVAVTVAVAAPVPRRPAVVSVKKEVARLDEQSDTGSSSSVVDASPAVGVGLDLNLPPPIEEA*
Os06g06970	MEKNTAASGQLMTSSAEATPSSPKRPAGRTKFQETRHLVFRGVRWRGCAGRWVCKVRVPGSRGDRFWIGTSDTAEETARTHDAAMLALCGASASLNFADSAWLLHVPRAPVVSGLRPPAARCATRCLQGHRRVPAPGRGSTATATATSGDAASTAPPSAPVLSAKQCEFIFLSSLDCWMLMSKLISSSRAKGSLCLRKNPISFCMVTNSYTALLLEYIILQMNSMIVLIHELSKYQVFLLLTMITHHLFQWRR*
Os02g52670	MVPRVERGGGGFHLPNSEREDSLFIRALISVVSGDTTVPTLLPEPTMATVVAGAATCARCGVDGCIGVDCEVVVLAAAAGSSCSDEEDEGECTTGAVASGGVTGGVGKRRPRRRSGGEGSRYRGVRRRPWGKWAAEIRDPRRAVCKWLGTFDTAEDAARAYDVAALEFRGQRAKLNFPASTAAQQPRPLLHHNLRENCGSNASSPVHAPEHARTAAAAKDQEIWDGLREIMMLDDGSFWSMP*
Os06g11860	MAAIDLYKYQLSSSSSSSSSDQELMKALEPFIRSASPTSTSTSTPLFYSSSSISTTTTTPFSYSSPLPQESYYLPASSSYAAIVPPPTTTTNTTTSFSELPPLPPSSSSFASPANAAAVGLAHLGPEQIQQIQVQFLMQQQLQQRGMAASASASAAASYLGPRAQPMKQAGAAAAAAAGGKMYRGVRQRHWGKWVAEIRLPKNRTRLWLGTFDTAEDAALAYDKAAFRLRGDAARLNFPTLRRGGAHLAGPLHASIDAKLTAICHSLAAAPPASSKKAAAAAAHPDSPKGSASTTTTTSEGDESAISACSPPLPPPPPPPPAALPEMANLDFTEAPWDESDAFHLYKCPSWEIDWDSILS*
Os06g09390	MCGGAILSDLIPPPRRVTAGDLWLEKTKKQQQQKKKNKGARRLPLRQEEEDDFEADFEEFEVDSGEWEVESDADEAKPLAAPRSGFAKGGLKNTTVAGADGPAARSAKRKRKNQFRGIRQRPWGKWAAEIRDPRKGVRVWLGTFNSPEEAARAYDAEARRIRGKKAKVNFPDGAPVASQRSHAEPSSMNMPAFSIEEKPAVMSAGNKTMYNTNAYAYPAVEYTLQEPFVQIQNVSFVPAMNAIEDTFVNLSSDQGSNSFGCSDFSQENDIKTPDITSMLAPTMTGVDDSAFLQNNASDAMVPPVMGNASIDLADLEPYMKFLIDGGSDESIDTLLSSDGSQDVASSMDLWSFDDMPVSAEFY*
Os06g09760	MLLPRTDCQANGTSPAPVERKYRGVRLRQWGKWVAEIRLPNSLKRIWLGSYDSPEKAARAFDAAFICLRGGEAIAGLNFPESPPTVVARTSDPREVLAYATSHANRLGCHHCTGRSSSGGGGDG*
Os06g09790	MQANTTQPAPEKETRYKGVRLRQWGKWVAEIRLPNSRKRIWLGSYYTPEKAARAFDAAFICLRGGEAIAGLNFTESPPAVVARTTDPREVLAFATSHANLLSLLDAAIAQEEEAHSFKKEEEAQVEEKTAEESSDVVRANAAPPPPVQVAGGSFDWSQLPLYSPTTTPAAEHWEEDNVEGDIPVCSEISVETSSNSRYIGVVFQMHSYG*
Os08g31580	MAAAIEGNLMRALGEAPSPQMQKIAPPPFHPGLPPAPANFSSAGVHGFHYMGPAQLSPAQIQRVQAQLHMQRQAQSGLGPRAQPMKPASAAAPAAAAARAQKLYRGVRQRHWGKWVAEIRLPRNRTRLWLGTFDTAEEAALTYDQAAYRLRGDAARLNFPDNAASRGPLDAAVDAKLQAICDTIAASKNASSRSRGGAGRAMPINAPLVAAASSSSGSDHSGGGDDGGSETSSSSAAASPLAEMEQLDFSEVPWDEAEGFALTKYPSYEIDWDSLLNNNN*
Os06g09717	MSSSSSATTTKYRGVRLRKWGKWVSEIRLPNSRERIWLGSYDTPEEAARAFDAAFVCLRGGGEAAGNGINFPGSPPAVARTSDPQEVYAAAVSHANNRPPPPPSARATSSALPWEEAPVVAAQEAAADMAPDVVVLPSSPVNVLAAAGSFEYWSQQPLYSPTAASLDLQRWMTAAAAAEESIMEDDDDEGTSDGLWSFHYSPTRSKW*
Os03g09170	MATTVDWCGRGSNLPAAMYDMVVDSKELMGALAPSMVSFSYPCSEQSASSLLAGANYLTPAQVLHVQAQLQRLRRPGAASGCLAAAPPLPMKRHGAVAVAAAAAARAPVKLYRGVRQRHWGKWVAEIRLPRNRTRLWLGTFDTAEEAALAYDSAAFRLRGESARLNFPELRRGGAHLGPPLHAAVDAKLHAICHGMDLPQPQPQTQSNATTTTMSTTATNTPSPFFSSESPVVKSEPVCSASESSSSADGDVSSTGSSDVVPEMQLLDFSEAPWDESESFLLHKYPSLEIDWDAILS*
Os06g09810	MEPVSFMQKSAAAAADGGSAAQAAAERRKYKGVRLRQWGKWAAEIRLPSSCERIWLGSYDTPEKAARAFDAAFICLRGVQAIAGLNFPESPPPPTAARTGDLREVYAFAVSHANRPSAEAAPADIVVPAQVATEESDGVVRGNAAPPPVQVAAGSLDWSQFMANPPPMYSPTATAGSQAMWPVTAPAAEADGEDDELATTCRWSFDA*
Os02g38090	MQAQQAMDEPANAQLYGHAHAHSHHHRSKRPSPGGGGGGAATLGADGGGGGGSLSGTRYRGVRRRPWGRFAAEIRDPASKERRWLGTFDTAEQAACAYDVAARAMRGTRARTNFPVPAAAGFPGGGGGGCWPWVNIPPQGAAAAASHQQPLNTLLLHNLLMSSSPHGCLLLHHAGHGHGHAHSHSHSHSRAHNPSTRPPTSAPPPPPPAAASSATTAPATTTGAAATSAPGADDDAWGFLLRREPPEAGLLQDVLHGFYPTRRPHDDAGPAPKLERPYEATSSYRVSSPWGAVEDCDDGDGDGDDDYRGFPMMPQGLLEDVIQCPPYMEVLAAPSAAVGRVSRRG*
Os04g36640	MAATATACPAPPPPRSLYRGVALAAPGRRRAGDIPVLIEFWASWCGPCRMVHRIVDEIAQEYAGRIKCYKLDTDDYPQVATSYSIERIPTVLLFKDGEKTHSITGTLPKAVYISGIILDSTILTVIFMHADAANQLKVFLLIWYVTSLSSSFTRLYLLAFFAPGFVLLKYYLRVSSGTHAIWGDPSIAYEYIRMIVATRKHVLALRQQALILRLMSRNLGIISYSELFPFLTSRREQKIYLVTEARNLVRAGIWDLLISAPTVLRC*
Os02g45450	MDVSAALSSDYSSGTPSPVAADADDGSSAYMTVSSAPPKRRAGRTKFKETRHPVFKGVRRRNPGRWVCEVREPHGKQRIWLGTFETAEMAARAHDVAALALRGRAACLNFADSPRRLRVPPIGASHDDIRRAAAEAAEAFRPPPDESNAATEVAAAASGATNSNAEQFASHPYYEVMDDGLDLGMQGYLDMAQGMLIDPPPMAGDPAVGSGEDDNDGEVQLWSY*
Os06g10780	MEGVQHMEATSKCQTRHTHTEQQQQQQQHQTARHNERSLAFQAIKRFDMVKTAASNGAAAARRVGGGGDGKRAAYKGVRMRSWGSWVSEIRAPSQKTRIWLGSYSTAEAAARAYDAALLCLKGSAAADLNFPVRLPFDLPAAAMSPKSIQRVAAAAAANANANASSSCSAAVFAGVDDSGGASASEASTPACSSSDGAASPSPVSSPETVISDVDVDYSLLADIEAFFQSPKCMEYAMMDPCSAFFAPPPPPAMAMEEECGWEEEGDIALWSFSSLD*
Os10g22600	MDRQWRCLAAAASTSGNSKLPPLPMALGGAVEYGQLVHGAAAPVAPFFVDAEQQSLSPATAMVLGAGWYNYNLVTPSQAAQLHHRLRRAVGAAPCSMKRCGGMAAAAAGRLALVGPAPVQAKLYRGVRQRHWGKWVAEIRLPRNRTRLWLGTYDTAEDAALAYDGAAFRLRGDAARLNFPELRRGGRHHAPALSASVDAKILQATTTTTADTAAAAAPASTNTTPPPSPRVVKTEPGCCSVSEASTTTTADAADVSSTGSSPSPTSSNQAATATPPAPRPPPPLPETIQQLDFTEAPWDEADGFALRRYPSWEIDWDAILS*
Os03g08500	MCGGAILAELIPSAPAARRVTAGHVWPGDANKAKKKGARADDFEAAFRDFDNDSDDEEMMVEEAEEEEATSEHKPFVFRAKKAAAAASSRRRKPAQYRGVRRRPWGKWAAEIRDPVKGIRVWLGTFTNAEAAALAYDDAARAIRGDRAKLNFPSATTPDTRKRGRATAAAAPAVKATPVINLVEEEDEEEDRAGGHHRLRLRRRHRRAVRRAAVRRPVQPLQRRRLRVPGQPVQRRRRADHRRRRRRRPGHGALELRRRLLPRRRRGQLVLLGSSRRLRRPCDSILYHVMYIEEWFCQASMCSSWFLSVMKNYVRLLVLVKDLFGCAFDAKI*
Os08g27220	MVAFRRIRISYSDPDATDSDSDSDSADAGDHDISSRSSRTNAAARRKVIVISLSRKKGRSLSQSGRHYRRRRSEIPAAAAKAVEAEDWPSSSDGMRRGAVAAARSASAAAKKGSRGGVYQRQPGRWAVDFRDSQLKVRQWLGTFPSEEEARAAYDAFEVQVRASLSRGGAGASSPAVAIAPSPARVKIQLPAPRRASGRRKKTQTTATVTTTTTTESLSQVTASSASPSSKEAPPPSSSASAATPPPLNPPPFVVDTFLGEDDHLAADEDDRFGFGLADLGHLPLPFLDDNDMDFKLSDSDDLSFLFDIGFM*
Os09g20350	MAAAIDLSGEELMRALEPFIRDASGSPPVCSQFSPTSPFSFPHAFAYGGGLAQQPELSPAQMHYIQARLHLQRQAAQAGPLGPRAQPMKASSSSASAAGAAATPPRPQKLYRGVRQRHWGKWVAEIRLPRNRTRLWLGTFDTAEEAALAYDQAAYRLRGDAARLNFPDNAASRGPLHASVDAKLQTLCQNIAAAKNAKKSSVSASAAATSSAPTSNCSSPSSDDASSCLESADSSPSLSPSSAATTAETPATVPEMQQLDFSEAPWDEAAAFALTKYPSYEIDWDSLLAAN*
Os05g49010	MAIGAAPASNQPHDTSNILENVWASIMTSSSSPAVSSSVAVSSSAVTGQEENSAILQRLPSLGRWISMGAEEWDELLLSGAALASESSGELQLVAASPGDHNQVVGGGGGANYRTTATAAARRSYRGVRRRPWGKFAAEIRDTRRRGARVWLGTFATADEAALAYDMAALRMRGHRAHLNFPLATVQKHLERDLAGGRSSSDQTSTRARRRRRPRANTTTDAAARSVVFSGVQTATNCDHMVSFASEKDQVSMQECSKSDAGVIDFEEIGGEYWDYLFPPLV*
Os02g09650	MRRGGAAEEDAEAARFRGVRKRPWGRYAAEIRDPAKKARVWLGTYDSAEDAARAYDAAARALRGAKAKTNFPLSLPHAQPQLHHHHHHHLTYPAAAVVAARPATSSLSSTVESFGTRPRPVLPPRPPPPPPIPDGDCRSDCGSSASVVDDDCADAAASPSCRLPFQFDLNLPPGGGGGGGGGFGCAYDDEELRLTALRL*
Os06g36000	MPMPEYELAACSPASPSSSASSTSTPPSPGGEAAARCGEKRGRGGGGGRHPTYRGVRMRAWGKWVSEIREPRKKSRIWLGTFPTPEMAARAHDAAALVVKGPAAVLNFPGAAASLPRPASAAPRDVQAAAARAAAMALDAVVPAPPSPPPPLMPPQASPSEAARAHALVAQVDQDDDDEELEEIVELPPIDELDAAAELVFASSGATTFHYDPAADQPWYDQPAACLQDGGGGGIAVHDALGFELDHVWADGVVASGFGALLWNM*
Os02g54160	MCGGAIIHHLKGHPEGSRRATEGLLWPEKKKPRWGGGGRRHFGGFVEEDDEDFEADFEEFEVDSGDSDLELGEEDDDDVVEIKPAAFKRALSRDNLSTITTAGFDGPAAKSAKRKRKNQFRGIRQRPWGKWAAEIRDPRKGVRVWLGTFNSAEEAARAYDAEARRIRGKKAKVNFPEAPTTAQKRRAGSTTAKAPKSSVEQKPTVKPAFNNLANANAFVYPSANFTSNKPFVQPDNMPFVPAMNSAAPIEDPIINSDQGSNSFGCSDFGWENDTKTPDITSIAPISTIAEVDESAFIKSSTNPMVPPVMENSAVDLPDLEPYMRFLLDDGAGDSIDSLLNLDGSQDVVSNMDLWSFDDMPVSDFY*
Os06g07030	MDRREATVFLPPPPPPQPTQPQQQPAAAAVRAPVGGRGGGGGRQYRGVRMRKWGKWVAEIREPNKRSRIWLGSYSTAVAAARAYDTAVFYLRGRSARLNFPDQLDGAGGGGAGAGGAEDHRELTAAVIRKKAAEVGARVDAQHSVVGAAAPVPLQPPQPPPPQRRRTKNPDLNREPTPDTSDDE*
Os04g55520	MQGEYHRSSSEDSAASAAAAAAAAAAAMAPLAAAAAAVAAKEEQAAAAAVLPLQQQQPRRQYRGVRMRKWGKWVAEIREPHKRTRIWLGSYATPVAAARAYDTAVFYLRGRSARLNFPEEISSLASLSEGGGASEPREPDGGTLSAASIRKKAIEVGSRVDALQTGMMVAPTTHHRERQKHHHHHHHHHPHLQPHGEEQHHHHEQKHQRTAWSGRAKNPDLNQAPSPENSDAE*
