# Supplementary material for: Identification and expression analysis of the DREB transcription factor family in pineapple (Ananas comosus (L.) Merr.)
Source: PeerJ. 2020 Apr 28;8:e9006. doi: 10.7717/peerj.9006 (PMC7194095; doi:10.7717/peerj.9006)
Supplement: Supplemental Information 9 [file peerj-08-9006-s009.xlsx]

## Sheet: Sheet1
Table S8 Cis-acting elements in AcoDREB promoters
Gene ID	Site name	Sequence	Position	Matrix score	Strand	Function	GO
AcoDREB01	DRE1	ACCGAGA	79	7	-	Dehydration responsive	GO:0006355, GO:0003700
AcoDREB01	MBS	CAACTG	446	6	-	Drought-inducibility
AcoDREB01	MBS	CAACTG	1955	6	-	Drought-inducibility
AcoDREB02	DRE core	GCCGAC	1946	6	-	Dehydration responsive	GO:0006355, GO:0003700
AcoDREB02	W box	TTGACC	268	6	-	Defense responsive
AcoDREB02	ABRE	CGCACGTGTC	572	9	-	Abscisic acid responsive
AcoDREB03	ABRE	ACGTG	1012	5	+	Abscisic acid responsive	GO:0006355, GO:0003700
AcoDREB03	ABRE	CACGTG	1703	6	-	Abscisic acid responsive
AcoDREB03	ABRE	ACGTG	1704	5	+	Abscisic acid responsive
AcoDREB04	LTR	CCGAAA	607	6	+	Low-temperature responsive	GO:0006355, GO:0003700
AcoDREB05	DRE core	GCCGAC	193	6	-	Dehydration responsive	GO:0006355, GO:0003700
AcoDREB05	DRE core	GCCGAC	1426	6	+	Dehydration responsive
AcoDREB05	DRE core	GCCGAC	1948	6	+	Dehydration responsive
AcoDREB05	W box	TTGACC	2249	6	-	Defense responsive
AcoDREB05	LTR	CCGAAA	697	6	-	Low-temperature responsive
AcoDREB05	LTR	CCGAAA	760	6	-	Low-temperature responsive
AcoDREB05	LTR	CCGAAA	2189	6	+	Low-temperature responsive
AcoDREB05	LTR	CCGAAA	2448	6	-	Low-temperature responsive
AcoDREB05	MBS	CAACTG	175	6	-	Drought-inducibility
AcoDREB05	MBS	CAACTG	306	6	-	Drought-inducibility
AcoDREB05	MBS	CAACTG	371	6	-	Drought-inducibility
AcoDREB05	MBS	CAACTG	618	6	+	Drought-inducibility
AcoDREB05	MBS	CAACTG	776	6	+	Drought-inducibility
AcoDREB05	ABRE	ACGTG	2289	5	+	Abscisic acid responsive
AcoDREB05	ABRE	ACGTG	2766	5	-	Abscisic acid responsive
AcoDREB05	ABRE	ACGTG	2799	5	+	Abscisic acid responsive
AcoDREB05	ABRE	CGCACGTGTC	2904	9	+	Abscisic acid responsive
AcoDREB05	ABRE	CACGTG	2906	6	-	Abscisic acid responsive
AcoDREB05	ABRE	ACGTG	2907	5	+	Abscisic acid responsive
AcoDREB05	ABRE	ACGTG	2948	5	-	Abscisic acid responsive
AcoDREB06	W box	TTGACC	1811	6	+	Defense responsive	GO:0006355, GO:0003700
AcoDREB06	DRE1	ACCGAGA	955	7	-	Dehydration responsive
AcoDREB06	LTR	CCGAAA	195	6	-	Low-temperature responsive
AcoDREB06	LTR	CCGAAA	799	6	-	Low-temperature responsive
AcoDREB06	LTR	CCGAAA	1744	6	+	Low-temperature responsive
AcoDREB06	ABRE	ACGTG	861	5	+	Abscisic acid responsive
AcoDREB06	ABRE	CACGTG	1376	6	-	Abscisic acid responsive
AcoDREB06	ABRE	ACGTG	1377	5	+	Abscisic acid responsive
AcoDREB06	ABRE	ACGTG	1584	5	-	Abscisic acid responsive
AcoDREB06	ABRE	GCCGCGTGGC	1624	9	-	Abscisic acid responsive
AcoDREB06	ABRE	CACGTG	1626	6	-	Abscisic acid responsive
AcoDREB06	ABRE	ACGTG	1627	5	+	Abscisic acid responsive
AcoDREB06	ABRE	ACGTG	1671	5	+	Abscisic acid responsive
AcoDREB07	LTR	CCGAAA	1085	6	-	Low-temperature responsive	GO:0006355, GO:0003700
AcoDREB07	LTR	CCGAAA	1880	6	+	Low-temperature responsive
AcoDREB07	MBS	CAACTG	1133	6	-	Drought-inducibility
AcoDREB07	ABRE	CACGTG	1155	6	-	Abscisic acid responsive
AcoDREB07	ABRE	ACGTG	1156	5	+	Abscisic acid responsive
AcoDREB07	ABRE	AACCCGG	1859	7	+	Abscisic acid responsive
AcoDREB08	DRE core	GCCGAC	408	6	+	Dehydration responsive	GO:0006355, GO:0003700
AcoDREB08	LTR	CCGAAA	1880	6	+	Low-temperature responsive
AcoDREB08	ABRE	ACGTG	850	5	-	Abscisic acid responsive
AcoDREB08	ABRE	AACCCGG	1859	7	+	Abscisic acid responsive
AcoDREB09	W box	TTGACC	56	6	-	Defense responsive	GO:0006355, GO:0003700
AcoDREB09	TC-rich repeats	ATTCTCTAAC	117	9	-	Defense and stress responsiveness
AcoDREB10	ABRE	ACGTG	496	5	+	Abscisic acid responsive	GO:0006355, GO:0003700
AcoDREB10	ABRE	ACGTG	756	5	+	Abscisic acid responsive
AcoDREB11	DRE core	GCCGAC	1022	6	-	Dehydration responsive	GO:0006355, GO:0003700
AcoDREB11	W box	TTGACC	1013	6	-	Defense responsive
AcoDREB11	ABRE	ACGTG	40	5	-	Abscisic acid responsive
AcoDREB11	ABRE	ACGTG	222	5	-	Abscisic acid responsive
AcoDREB11	ABRE	CGCACGTGTC	516	9	-	Abscisic acid responsive
AcoDREB11	ABRE	CACGTG	518	6	+	Abscisic acid responsive
AcoDREB11	ABRE	ACGTG	519	5	+	Abscisic acid responsive
AcoDREB11	ABRE	CGTACGTGCA	899	9	-	Abscisic acid responsive
AcoDREB11	ABRE	ACGTG	901	5	-	Abscisic acid responsive
AcoDREB12	W box	TTGACC	1220	6	-	Defense responsive	GO:0006355, GO:0003700
AcoDREB12	TC-rich repeats	GTTTTCTTAC	1472	9	+	Defense and stress responsiveness
AcoDREB12	ABRE	GACACGTGGC	159	9	-	Abscisic acid responsive
AcoDREB12	ABRE	CACGTG	161	6	+	Abscisic acid responsive
AcoDREB12	ABRE	ACGTG	162	5	+	Abscisic acid responsive
AcoDREB12	ABRE	GCAACGTGTC	397	9	-	Abscisic acid responsive
AcoDREB12	ABRE	CACGTG	1866	6	-	Abscisic acid responsive
AcoDREB12	ABRE	ACGTG	1867	5	+	Abscisic acid responsive
AcoDREB13	DRE core	GCCGAC	1333	6	+	Dehydration responsive	GO:0006355, GO:0003700
AcoDREB13	MBS	CAACTG	1137	6	-	Drought-inducibility
AcoDREB13	ABRE	CACGTG	1063	6	-	Abscisic acid responsive
AcoDREB13	ABRE	ACGTG	1064	5	+	Abscisic acid responsive
AcoDREB13	ABRE	ACGTG	1129	5	-	Abscisic acid responsive
AcoDREB13	ABRE	ACGTG	1559	5	-	Abscisic acid responsive
AcoDREB13	ABRE	CGTACGTGCA	1937	9	-	Abscisic acid responsive
AcoDREB14	W box	TTGACC	535	6	+	Defense responsive	GO:0006355, GO:0003700
AcoDREB14	W box	TTGACC	566	6	-	Defense responsive
AcoDREB14	W box	TTGACC	1719	6	+	Defense responsive
AcoDREB14	W box	TTGACC	1788	6	-	Defense responsive
AcoDREB14	W box	TTGACC	1853	6	+	Defense responsive
AcoDREB14	LTR	CCGAAA	415	6	-	Low-temperature responsive
AcoDREB15	DRE core	GCCGAC	1178	6	+	Dehydration responsive	GO:0006355, GO:0003700
AcoDREB15	LTR	CCGAAA	77	6	+	Low-temperature responsive
AcoDREB15	LTR	CCGAAA	331	6	-	Low-temperature responsive
AcoDREB15	MBS	CAACTG	1780	6	+	Drought-inducibility
AcoDREB15	ABRE	ACGTG	954	5	+	Abscisic acid responsive
AcoDREB16	W box	TTGACC	628	6	+	Defense responsive	GO:0006355, GO:0003700
AcoDREB16	W box	TTGACC	1046	6	+	Defense responsive
AcoDREB16	DRE1	ACCGAGA	1382	7	-	Dehydration responsive
AcoDREB16	LTR	CCGAAA	495	6	-	Low-temperature responsive
AcoDREB16	ABRE	ACGTG	67	5	+	Abscisic acid responsive
AcoDREB16	ABRE	GACACGTGGC	901	9	+	Abscisic acid responsive
AcoDREB16	ABRE	CACGTG	903	6	+	Abscisic acid responsive
AcoDREB16	ABRE	ACGTG	904	5	+	Abscisic acid responsive
AcoDREB16	ABRE	TACGTGTC	1034	8	-	Abscisic acid responsive
AcoDREB16	ABRE	ACGTG	1036	5	-	Abscisic acid responsive
AcoDREB16	ABRE	GACACGTGGC	1064	9	+	Abscisic acid responsive
AcoDREB16	ABRE	CACGTG	1066	6	-	Abscisic acid responsive
AcoDREB16	ABRE	ACGTG	1067	5	+	Abscisic acid responsive
AcoDREB17	TC-rich repeats	ATTCTCTAAC	509	10	-	Defense and stress responsiveness	GO:0006355, GO:0003700
AcoDREB17	LTR	CCGAAA	964	6	+	Low-temperature responsive
AcoDREB17	ABRE	CGTACGTGCA	355	9	+	Abscisic acid responsive
AcoDREB17	ABRE	CACGTG	1094	6	-	Abscisic acid responsive
AcoDREB17	ABRE	ACGTG	1095	5	+	Abscisic acid responsive
AcoDREB17	ABRE	GACACGTGGC	1151	9	+	Abscisic acid responsive
AcoDREB17	ABRE	CACGTG	1153	6	-	Abscisic acid responsive
AcoDREB17	ABRE	ACGTG	1154	5	+	Abscisic acid responsive
AcoDREB18	MBS	CAACTG	449	6	+	Drought-inducibility	GO:0006355, GO:0003700
AcoDREB18	MBS	CAACTG	1454	6	-	Drought-inducibility
AcoDREB18	ABRE	ACGTG	24	5	+	Abscisic acid responsive
AcoDREB18	ABRE	CGTACGTGCA	735	9	-	Abscisic acid responsive
AcoDREB18	ABRE	ACGTG	1762	5	-	Abscisic acid responsive
AcoDREB19	W box	TTGACC	1635	6	-	Defense responsive	GO:0006355, GO:0003700
AcoDREB19	MBS	CAACTG	1466	6	+	Drought-inducibility
AcoDREB19	ABRE	GACACGTGGC	292	9	+	Abscisic acid responsive
AcoDREB19	ABRE	CACGTG	294	6	+	Abscisic acid responsive
AcoDREB19	ABRE	ACGTG	295	5	+	Abscisic acid responsive
AcoDREB19	ABRE	CACGTG	1139	6	-	Abscisic acid responsive
AcoDREB19	ABRE	ACGTG	1140	5	+	Abscisic acid responsive
AcoDREB19	ABRE	ACGTG	1573	5	+	Abscisic acid responsive
AcoDREB19	ABRE	CGTACGTGCA	1704	9	+	Abscisic acid responsive	GO:0006355, GO:0003700
AcoDREB20	DRE core	GCCGAC	1946	6	-	Dehydration responsive
AcoDREB20	W box	TTGACC	268	6	-	Defense responsive
AcoDREB20	ABRE	CGCACGTGTC	572	9	-	Abscisic acid responsive
