# Supplementary material for: Identification and expression analysis of the DREB transcription factor family in pineapple (Ananas comosus (L.) Merr.)
Source: PeerJ. 2020 Apr 28;8:e9006. doi: 10.7717/peerj.9006 (PMC7194095; doi:10.7717/peerj.9006)
Supplement: Supplemental Information 10 [file peerj-08-9006-s010.xlsx]

## Sheet: Sheet1
Table S9 The expression profiles of the pineapple DREB genes in different tissues
Gene ID	flower	fruit	leaf	root	Calyx	Petal	O1	O2	O3	O4	O5	O6	O7	S1	S2	S3	S4	S5	S6	G1	G2	G3	G4	G5	G6	G7
AcoDREB09	3.92934	6.4029	4.36305	4.21584	47.0244	19.3435	6.8894	8.68399	7.18358	4.74181	4.42039	3.8409	5.86526	0.959516	0.901796	1.24325	1.42357	6.16609	1.5317	10.9671	14.5363	16.0256	11.3145	15.6257	9.59563	18.4488
AcoDREB08	0	0	0	0	0	0	0	0	0	0	0	0	0	0	0	0	0	0	0	0	0	0	0	0	0	0
AcoDREB07	0	0	0	0	0.0833333	0	0	0	0	0	0	0	0	0	0	0	0	0	0	0	0	0	0	0	0	0
AcoDREB02	0	0	0	0	0	0	0	0	0	0	0	0	0	0	0	0	0	0	0	0	0	0	0	0	0	0
AcoDREB10	0	0	0	0	0	0	0	0	0	0	0	0	0	0	0	0	0	0	0	0	0	0	0	0	0	0
AcoDREB03	0.0586469	0.252746	0.218152	2.51855	8.22639	6.1058	0.784858	0.498321	0.0767871	0.152914	0.125615	0.118701	0.0319044	0.154994	0.0695002	2.04771	0.0997679	0.177398	0.252211	2.16979	3.50217	1.25875	8.28816	1.00714	1.83271	9.02872
AcoDREB01	0	0	0	1.69728	7.77815	0.803739	0.102351	0.0552267	0.0155922	0.0324097	0.0156439	0.0148091	0.0159522	0.20421	0.0879128	0.219398	0.0504699	0.0129327	0	0.446496	0.87656	0.71978	1.07135	0.111522	0.452745	1.07809
AcoDREB12	0.117294	0	0	0.109502	2.77581	0.326553	0.0150875	0.145688	0.54103	0.262349	0.59856	0.0730929	2.7918	0.590666	0.885904	2.55964	0.196273	0.886776	0.0968207	0	0.0491294	0.0280062	0.106943	0.0658107	0.165433	0.154839
AcoDREB13	0	0	0	0	0	0	0	0	0	0	0	0	0	0	0	0	0	0	0	0	0.142857	0	0	0	0	0
AcoDREB15	0.0586469	0.0842487	0	0.0547511	7.53117	0.35559	0.71427	0.25379	0.26188	0.112169	0.298598	0.11712	0.0391156	0.0213832	0.0167448	0	0.0873794	0.0250513	0.0364168	0.0801232	0.103573	0	0.471429	0	0.0503641	0.543642
AcoDREB16	24.6903	149.794	33.5955	195.078	26.7573	38.9301	8.48134	7.77812	8.40219	8.042	6.98748	8.64134	10.9718	4.6007	4.574	5.8506	6.4766	15.1295	15.1891	12.3043	12.8623	15.2535	14.485	12.4479	12.7899	14.3534
AcoDREB17	71.8424	167.823	94.2419	134.524	253.202	197.533	148.245	142.147	136.486	119.187	122.986	78.6138	147.458	96.3914	72.3847	105.457	119.111	76.9041	33.5252	164.691	195.797	153.303	245.95	109.917	86.6386	107.312
AcoDREB20	3.69475	8.42487	3.70859	4.38009	20.2535	4.9454	6.95111	5.90489	3.59246	3.60272	4.09454	7.14582	2.70981	2.43346	2.07048	6.21626	4.50204	4.1674	2.90438	4.83537	8.61197	3.06799	11.6943	3.70552	5.15421	2.97166
AcoDREB11	0.351881	0.505492	0.109076	1.20452	18.4759	1.19372	0.176999	0.463275	0.781531	0.239074	0.297775	0.0450559	4.17567	1.98912	5.26667	6.72819	0.968212	3.60862	0.769064	0.490183	1.50359	1.06239	4.41123	0.274262	0.381229	0.174905
AcoDREB18	0	0.168497	0.109076	1.14977	0.0454622	0.0523663	0.0896493	0.19486	0.061949	0.152661	0.0311591	0.105397	0.07102	3.25919	1.74027	0.804458	5.1242	0.0258654	0.0845295	0.101966	0.0582666	0.0171151	0.0855829	0.0200993	0.0559829	0
AcoDREB04	0	0	0	0	0	0.333333	0	0	0	0.333333	0	0	0.666667	0	0	0	0	0.666667	0.333333	0	0.142857	0	0	0	0	0
AcoDREB14	0	0	0	0.711765	0.940569	0.237449	0.116466	0.0138423	0	0.0162049	0	0	0	0	0	0	0	0.0129327	0	0.249813	0.298797	0.0168048	0.770058	0.0516684	0.158934	0.271961
AcoDREB06	0.527822	0.336995	0.545381	0.164253	0.503045	1.26602	0.328326	0.389624	0.232958	0.25056	0.25074	0.519861	0.642079	0.235065	0.313476	0	0.0714228	0.776689	1.97179	0.583837	0.478813	0.36907	0.299562	0.454885	1.13818	0.415213
AcoDREB05	81.7538	26.3698	77.226	118.427	36.9415	54.221	15.4687	22.4653	19.6535	25.4513	19.8726	39.373	20.5723	20.7706	29.5175	106.042	50.6586	35.4343	53.8712	31.9436	28.0629	43.0301	44.9491	35.4796	39.5941	76.0422
AcoDREB19	44.3957	6.2344	48.3208	0.383258	22.4905	35.2557	3.71878	6.52487	5.37616	6.26301	9.567	16.9385	9.47779	1.64242	206.666	165.353	134.4	19.2713	31.2819	30.5688	45.216	62.5997	51.6035	75.6165	68.767	77.8126
