# Supplementary material for: Identification and expression analysis of the DREB transcription factor family in pineapple (Ananas comosus (L.) Merr.)
Source: PeerJ. 2020 Apr 28;8:e9006. doi: 10.7717/peerj.9006 (PMC7194095; doi:10.7717/peerj.9006)
Supplement: Supplemental Information 11 [file peerj-08-9006-s011.xlsx]

## Sheet: Sheet1
Table S10 The qRT-PCR results of the pineapple DREB verification genes
Gene ID	Fruit	Leaf	Root	Calyx	Petal	Ov1	Ov7	S1	S6
AcoDREB01	0	0	1.69728	7.77815	0.803739	0.102351	0.0159522	0.20421	0
AcoDREB02	0	0	0	0	0	0	0	0	0
AcoDREB03	0.252746	0.218152	2.51855	8.22639	6.1058	0.784858	0.0319044	0.154994	0.252211
AcoDREB05	26.3698	77.226	118.427	36.9415	54.221	15.4687	20.5723	20.7706	53.8712
AcoDREB06	0.336995	0.545381	0.164253	0.503045	1.26602	0.328326	0.642079	0.235065	1.97179
AcoDREB09	6.4029	4.36305	4.21584	47.0244	19.3435	6.8894	5.86526	0.959516	1.5317
AcoDREB10	0	0	0	0	0	0	0	0	0
AcoDREB11	0.505492	0.109076	1.20452	18.4759	1.19372	0.176999	4.17567	1.98912	0.769064
AcoDREB12	0	0	0.109502	2.77581	0.326553	0.0150875	2.7918	0.590666	0.0968207
AcoDREB14	0	0	0.711765	0.940569	0.237449	0.116466	0	0	0
AcoDREB15	0.0842487	0	0.0547511	7.53117	0.35559	0.71427	0.0391156	0.0213832	0.0364168
AcoDREB16	149.794	33.5955	195.078	26.7573	38.9301	8.48134	10.9718	4.6007	15.1891
AcoDREB17	167.823	94.2419	134.524	253.202	197.533	148.245	147.458	96.3914	33.5252
AcoDREB18	0.168497	0.109076	1.14977	0.0454622	0.0523663	0.0896493	0.07102	3.25919	0.0845295
AcoDREB19	6.2344	48.3208	0.383258	22.4905	35.2557	3.71878	9.47779	1.64242	31.2819
AcoDREB20	8.42487	3.70859	4.38009	20.2535	4.9454	6.95111	2.70981	2.43346	2.90438
